# Supplementary material for: Pathogenicity and Metabolites of Purpureocillium lavendulum YMF1.00683 against Meloidogyne incognita
Source: MDPI journal article supplement (doi:10.3390/pathogens11070795), 2022-07-14
Supplement: s1 [file s1]

**Supplementary Materials for**  
**Pathogenicity and Metabolites of *Purpureocillium***  
***lavendulum* YMF1.00683 against *Meloidogyne***  
***incognita***

**Zheng-Xue Bao, Rui Liu, Chun-Qiang Li, Xue-Rong Pan, Pei-Ji Zhao\***

State key Laboratory for Conservation and Utilization of Bio-Resources in Yunnan,  
School of Life Sciences, Yunnan University, Kunming, Yunnan 650091, China;

\* Correspondence: P-J. Z. (email: pjzhao@ynu.edu.cn);

## Contents of Supplementary Materials

|            |                                                                   |    |
|------------|-------------------------------------------------------------------|----|
| Figure S1  | <sup>1</sup> H NMR spectrum of compound <b>1</b>                  | 3  |
| Figure S2  | <sup>13</sup> C NMR spectrum of compound <b>1</b>                 | 4  |
| Figure S3  | HSQC spectrum of compound <b>1</b>                                | 5  |
| Figure S4. | HMBC spectrum of compound <b>1</b>                                | 6  |
| Figure S5  | <sup>1</sup> H- <sup>1</sup> H COSY spectrum of compound <b>1</b> | 7  |
| Figure S6. | ROESY spectrum of compound <b>1</b>                               | 8  |
| Figure S7. | HR-ESI-MS of compound <b>1</b>                                    | 9  |
| Figure S8  | UV spectrum of compound <b>1</b>                                  | 10 |
| Figure S9  | <sup>1</sup> H NMR spectrum of compound <b>2</b>                  | 11 |
| Figure S10 | <sup>13</sup> C NMR spectrum of compound <b>2</b>                 | 12 |
| Figure S11 | ESI-MS spectrum of compound <b>2</b>                              | 13 |
| Figure S12 | <sup>1</sup> H NMR spectrum of compound <b>3</b>                  | 14 |
| Figure S13 | <sup>13</sup> C NMR spectrum of compound <b>3</b>                 | 15 |
| Figure S14 | ESI-MS spectrum of compound <b>3</b>                              | 16 |
| Figure S15 | <sup>1</sup> H NMR spectrum of compound <b>4</b>                  | 17 |
| Figure S16 | <sup>13</sup> C NMR spectrum of compound <b>4</b>                 | 18 |
| Figure S17 | ESI-MS spectrum of compound <b>4</b>                              | 19 |
| Figure S18 | <sup>1</sup> H NMR spectrum of compound <b>5</b>                  | 20 |
| Figure S19 | <sup>13</sup> C NMR spectrum of compound <b>5</b>                 | 21 |
| Figure S20 | ESI-MS spectrum of compound <b>5</b>                              | 22 |
| Figure S21 | <sup>1</sup> H NMR spectrum of compound <b>6</b>                  | 23 |
| Figure S22 | <sup>13</sup> C NMR spectrum of compound <b>6</b>                 | 24 |
| Figure S23 | ESI-MS spectrum of compound <b>6</b>                              | 25 |
| Figure S24 | <sup>1</sup> H NMR spectrum of compound <b>7</b>                  | 26 |
| Figure S25 | <sup>13</sup> C NMR spectrum of compound <b>7</b>                 | 27 |
| Figure S26 | ESI-MS spectrum of compound <b>7</b>                              | 28 |

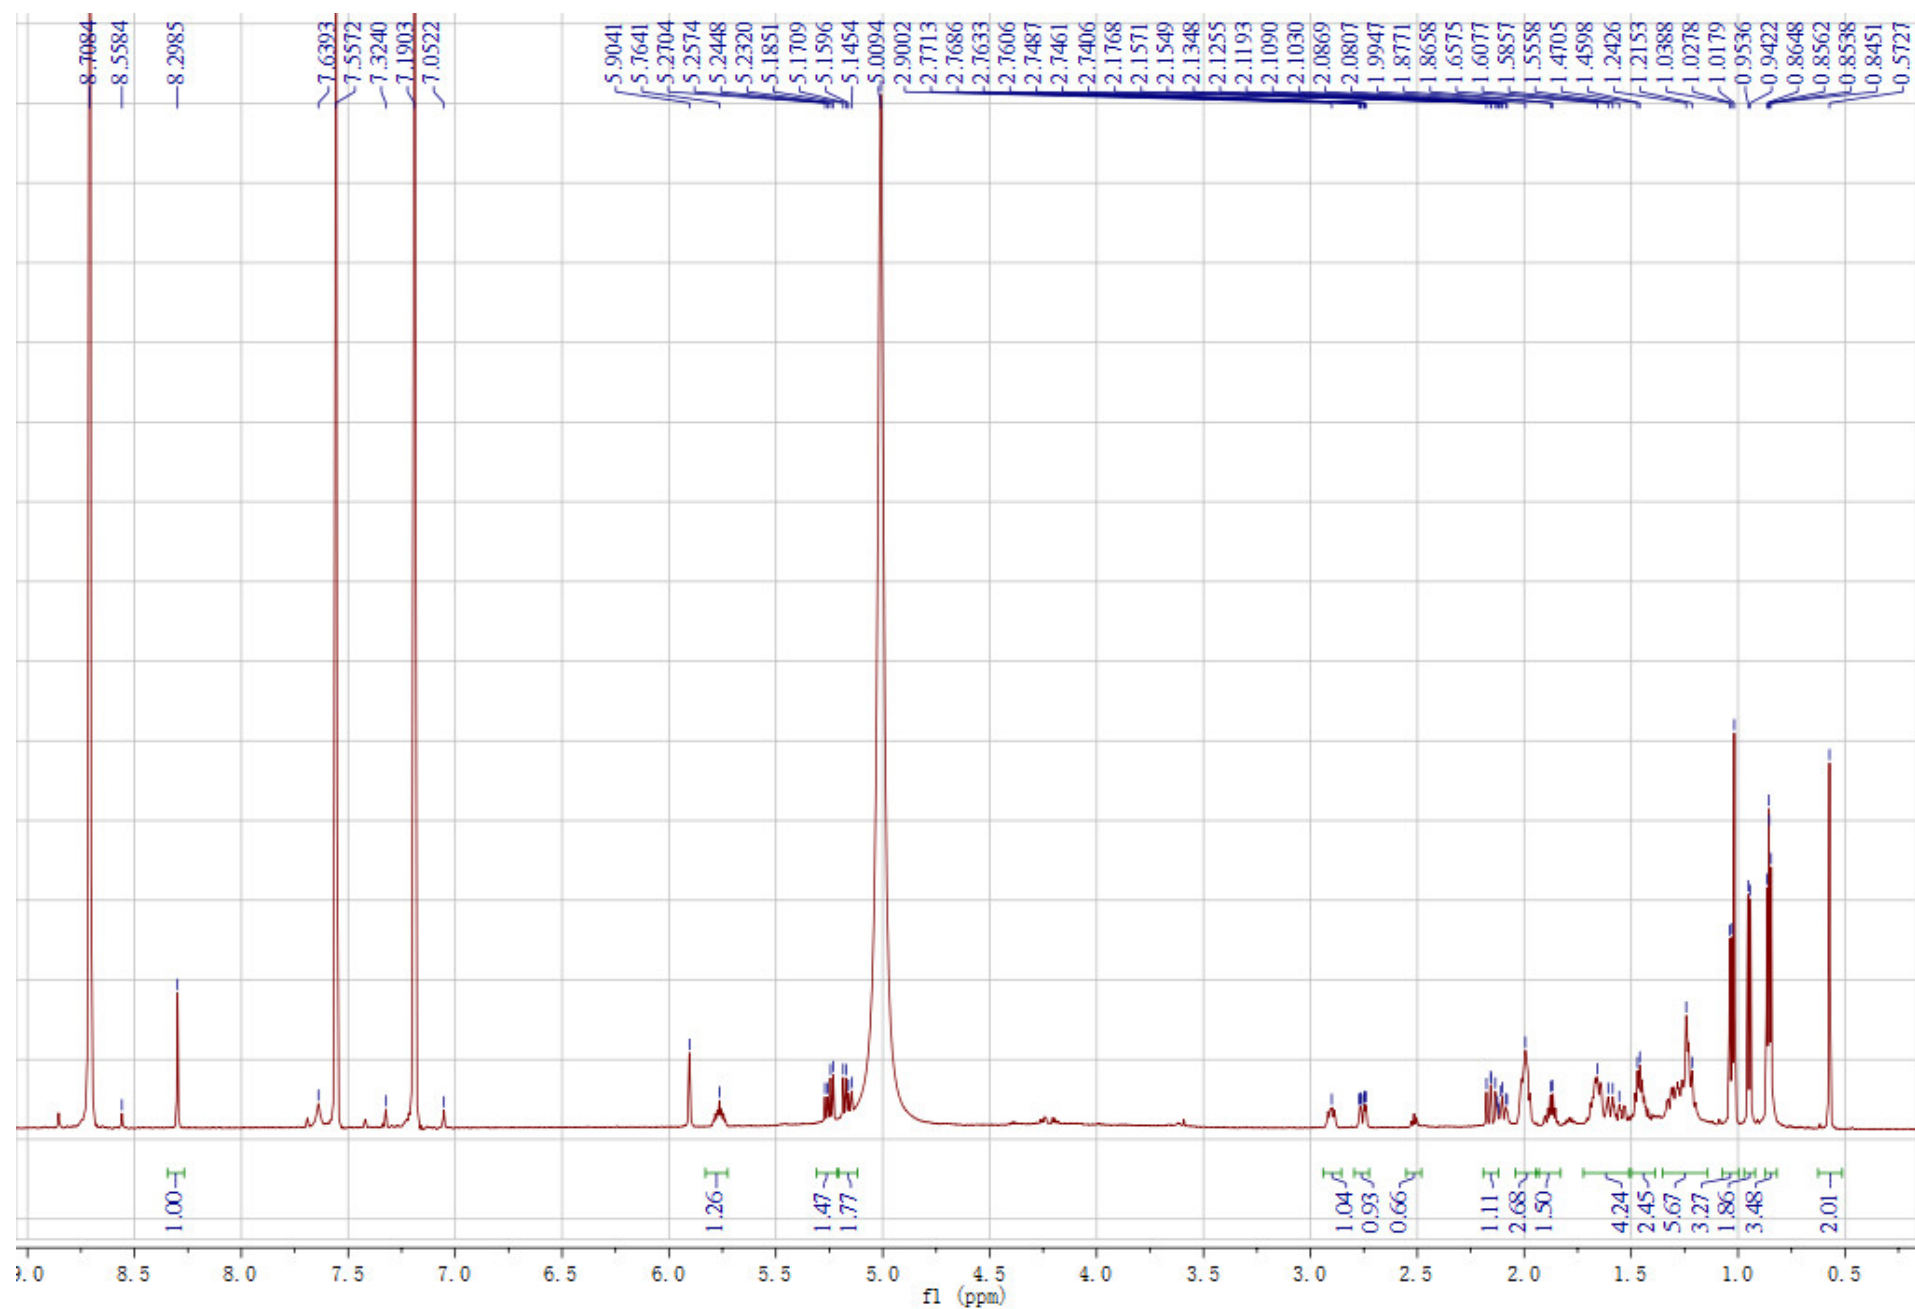

Figure S1. <sup>1</sup>H NMR spectrum of compound 1

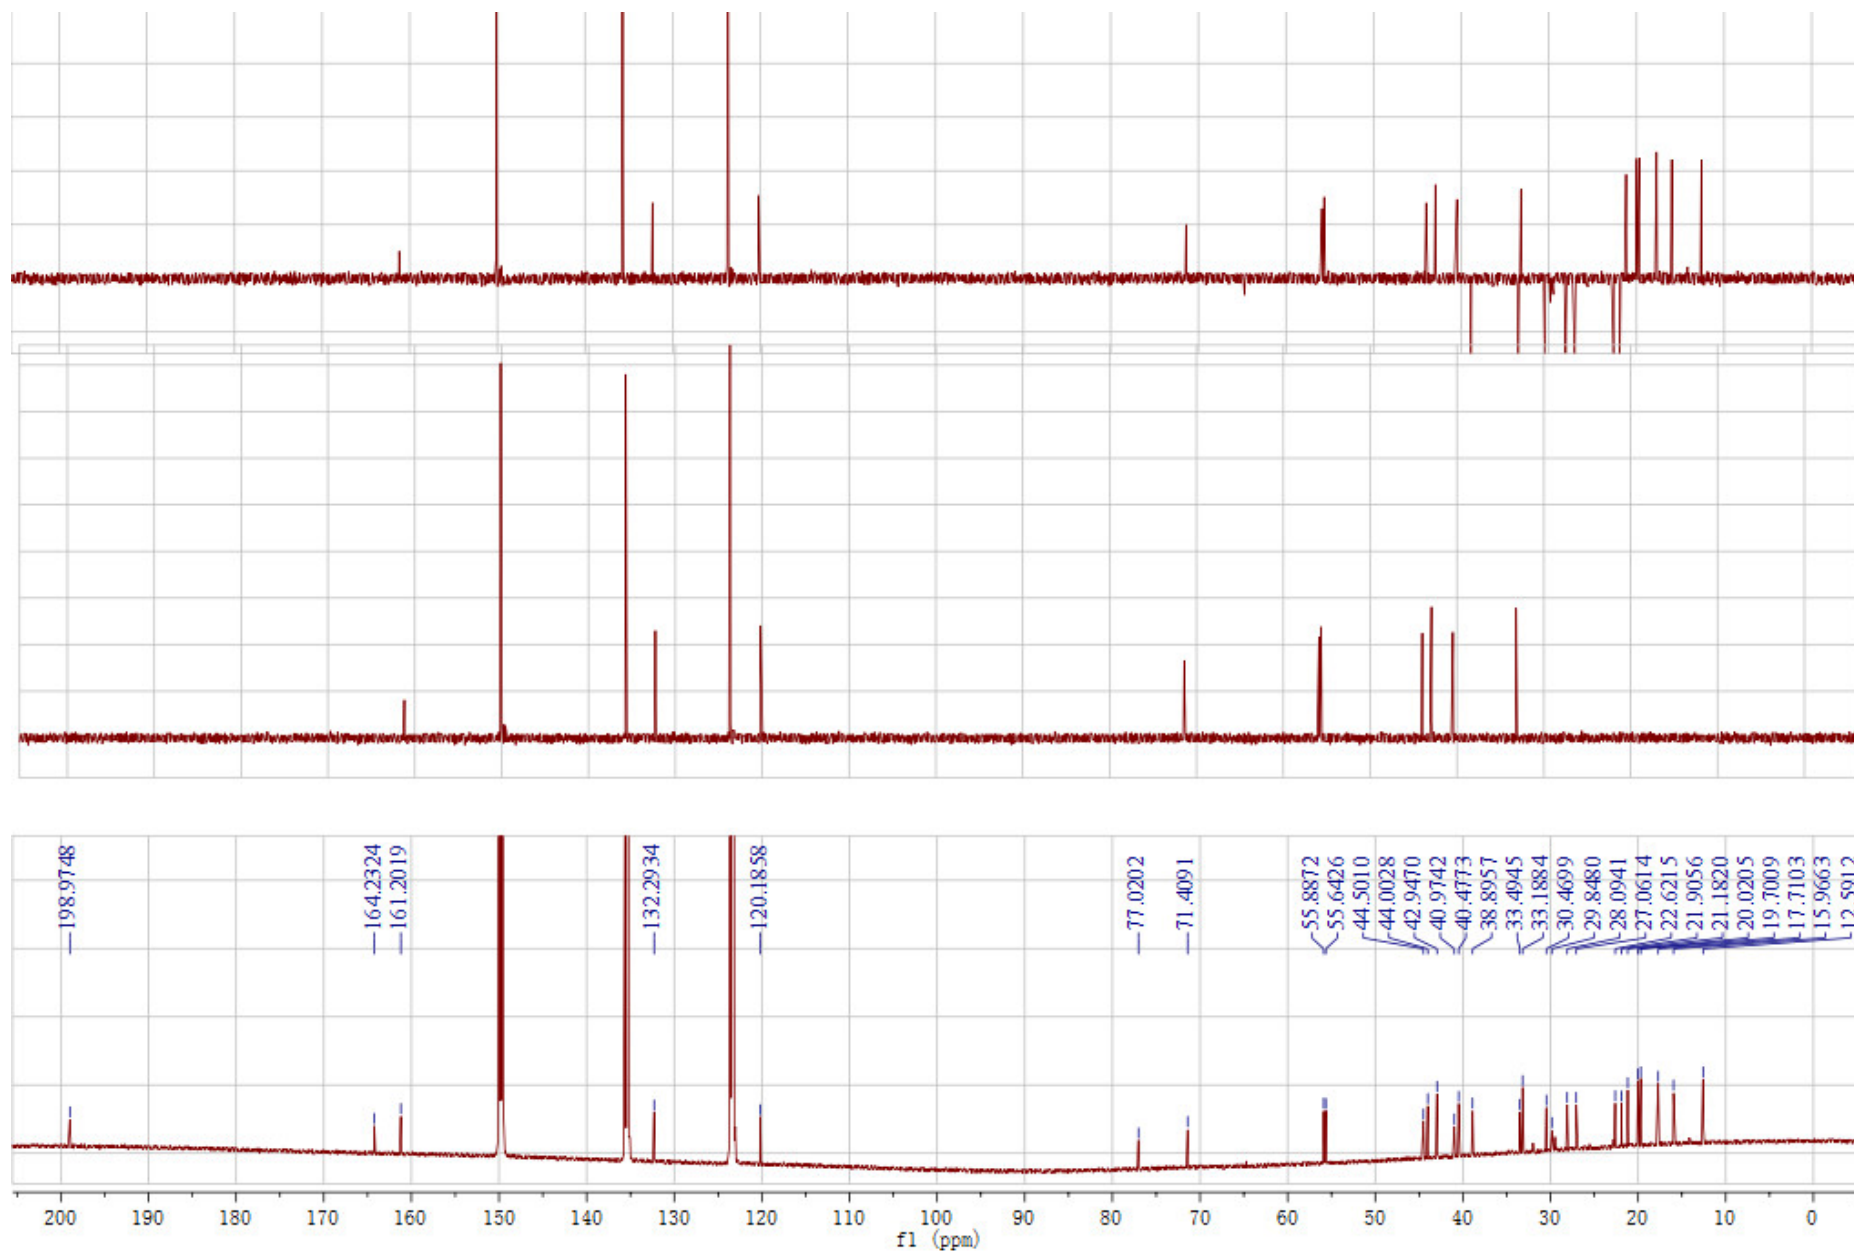

Figure S2.  $^{13}\text{C}$  NMR spectrum of compound 1

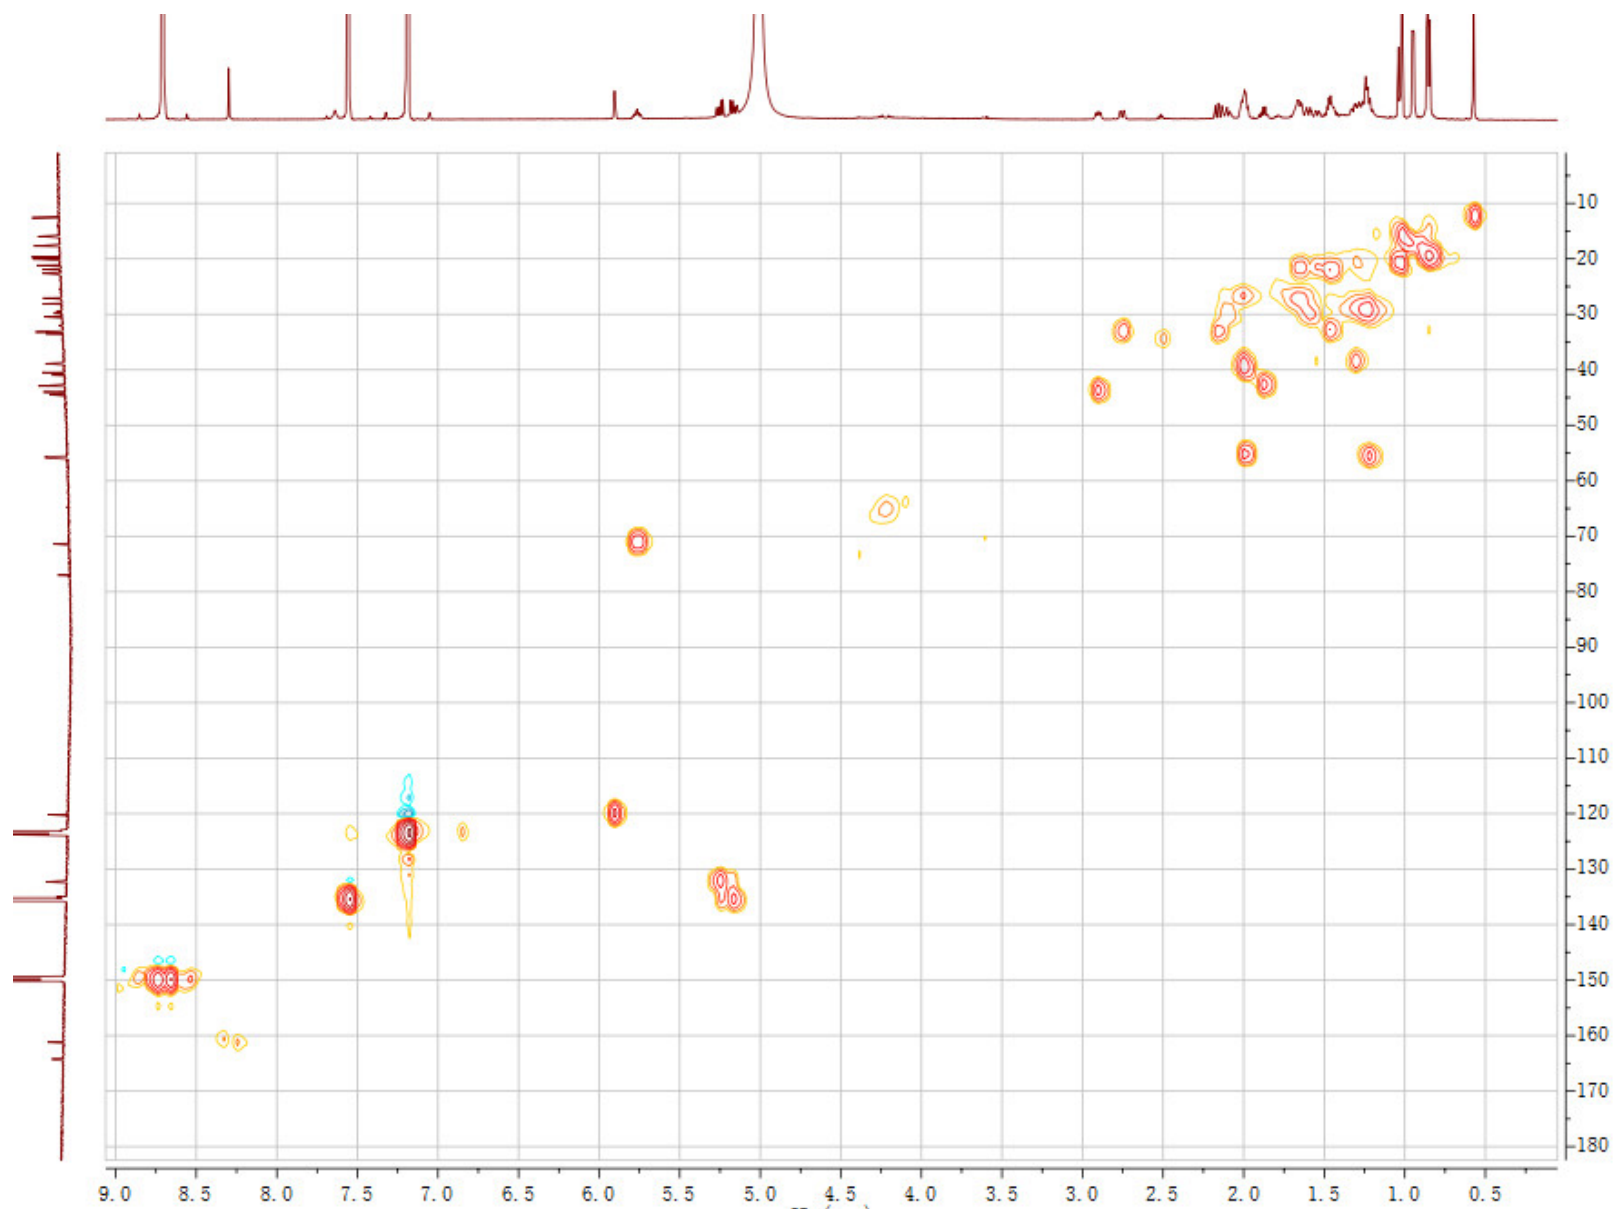

Figure S3. HSQC spectrum of compound 1

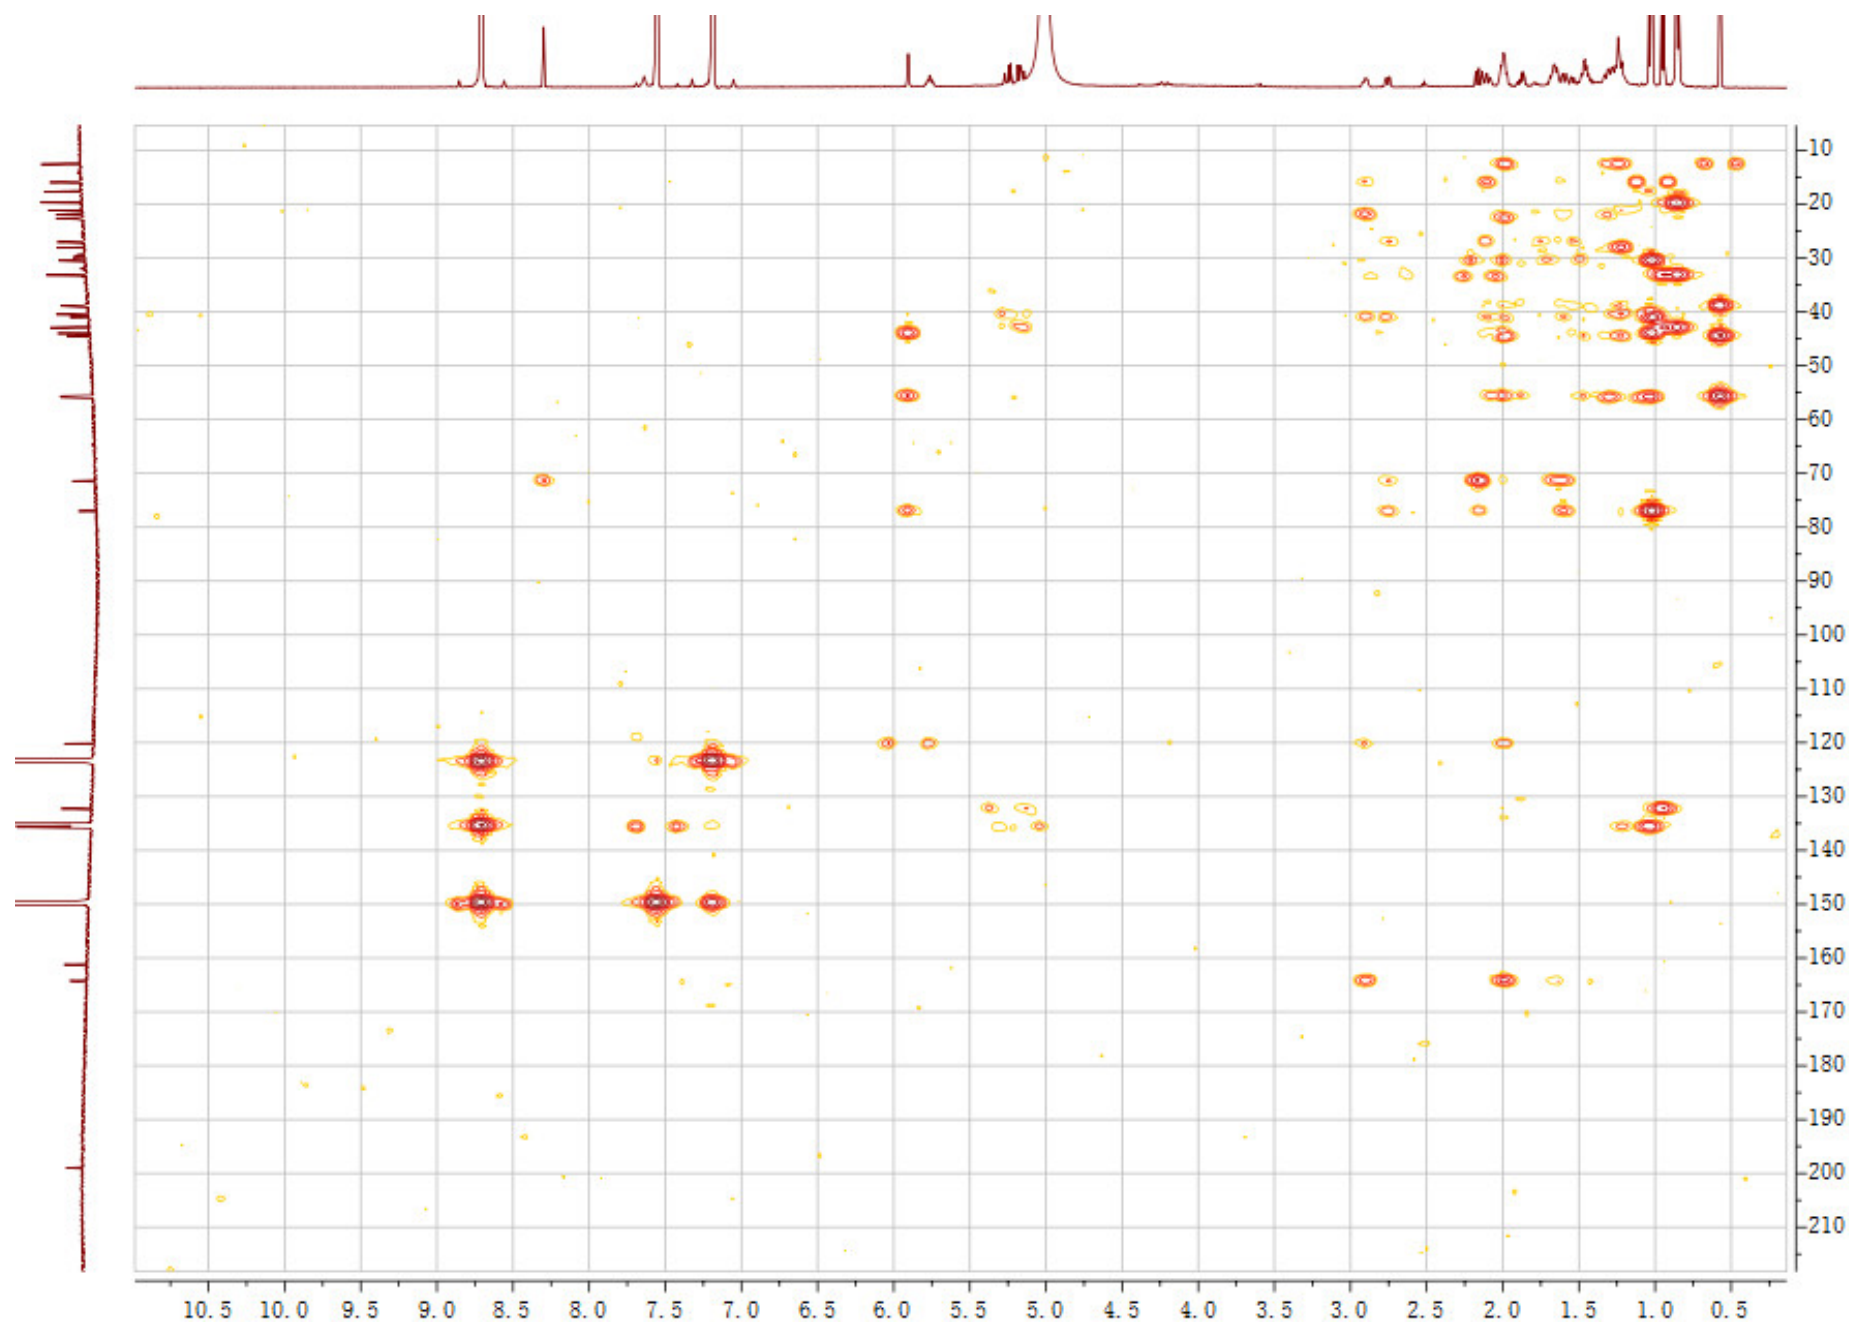

Figure S4. HMBC spectrum of compound 1

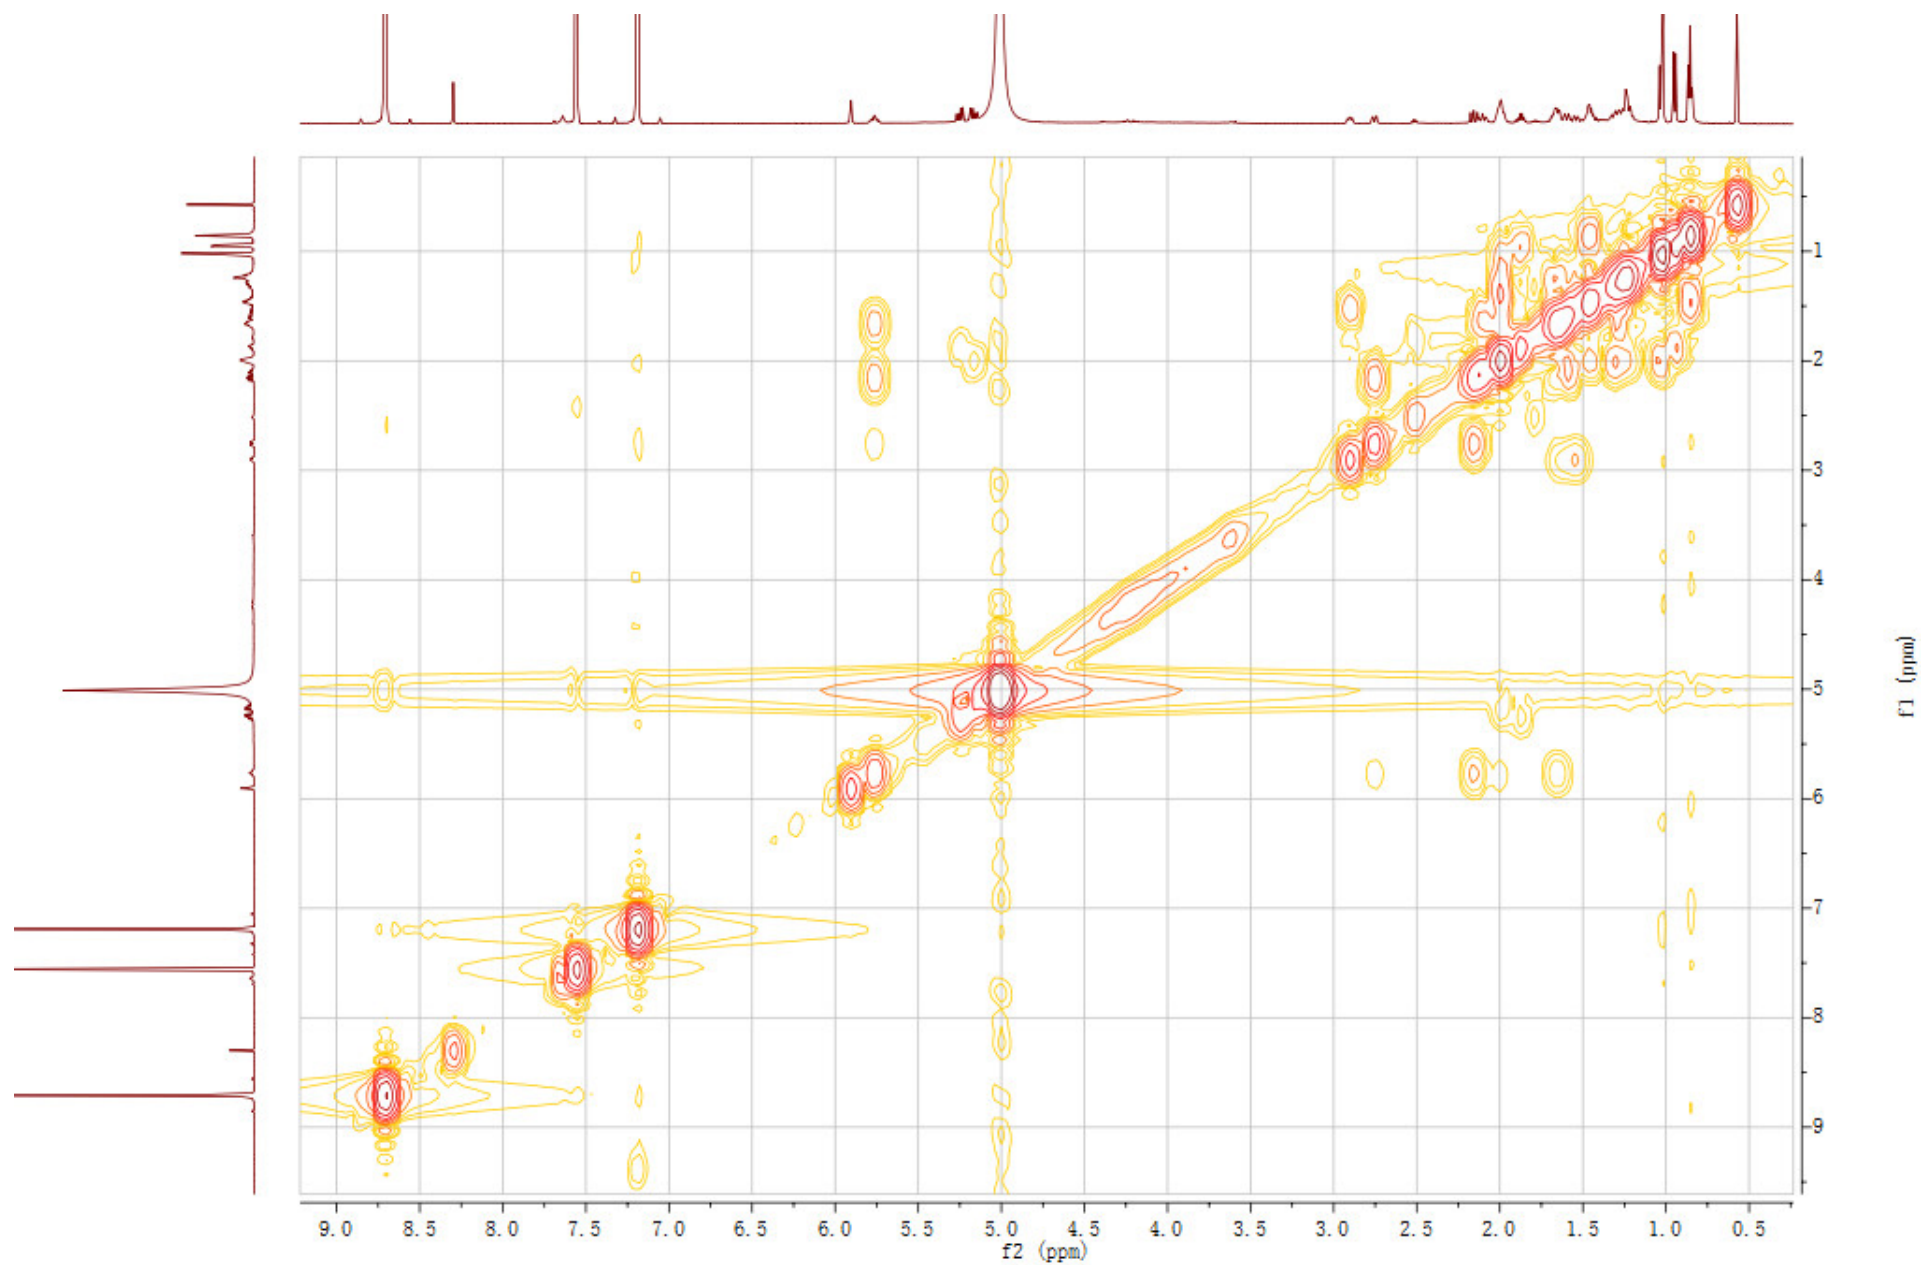

Figure S5.  $^1\text{H}$ - $^1\text{H}$  COSY spectrum of compound **1**

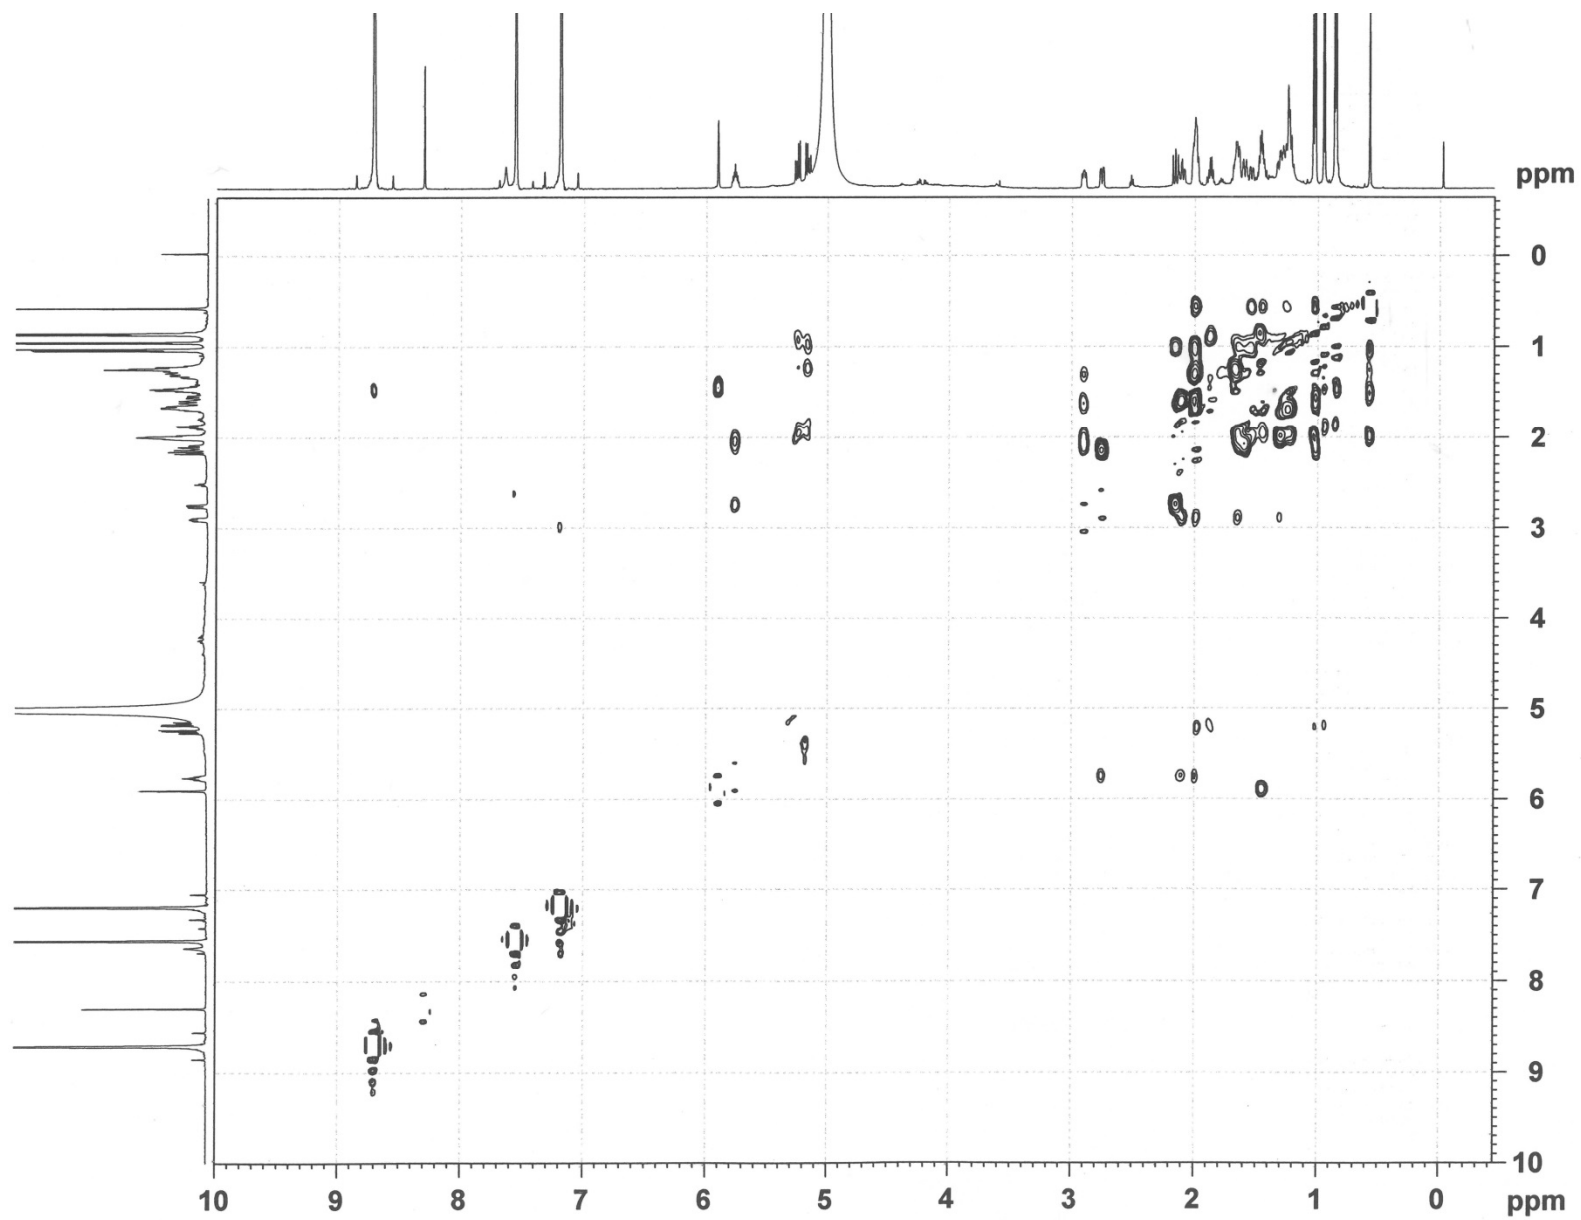

Figure S6. ROESY spectrum of compound **1**



T: FTMS + p ESI Full ms [120.0000-1000.0000]

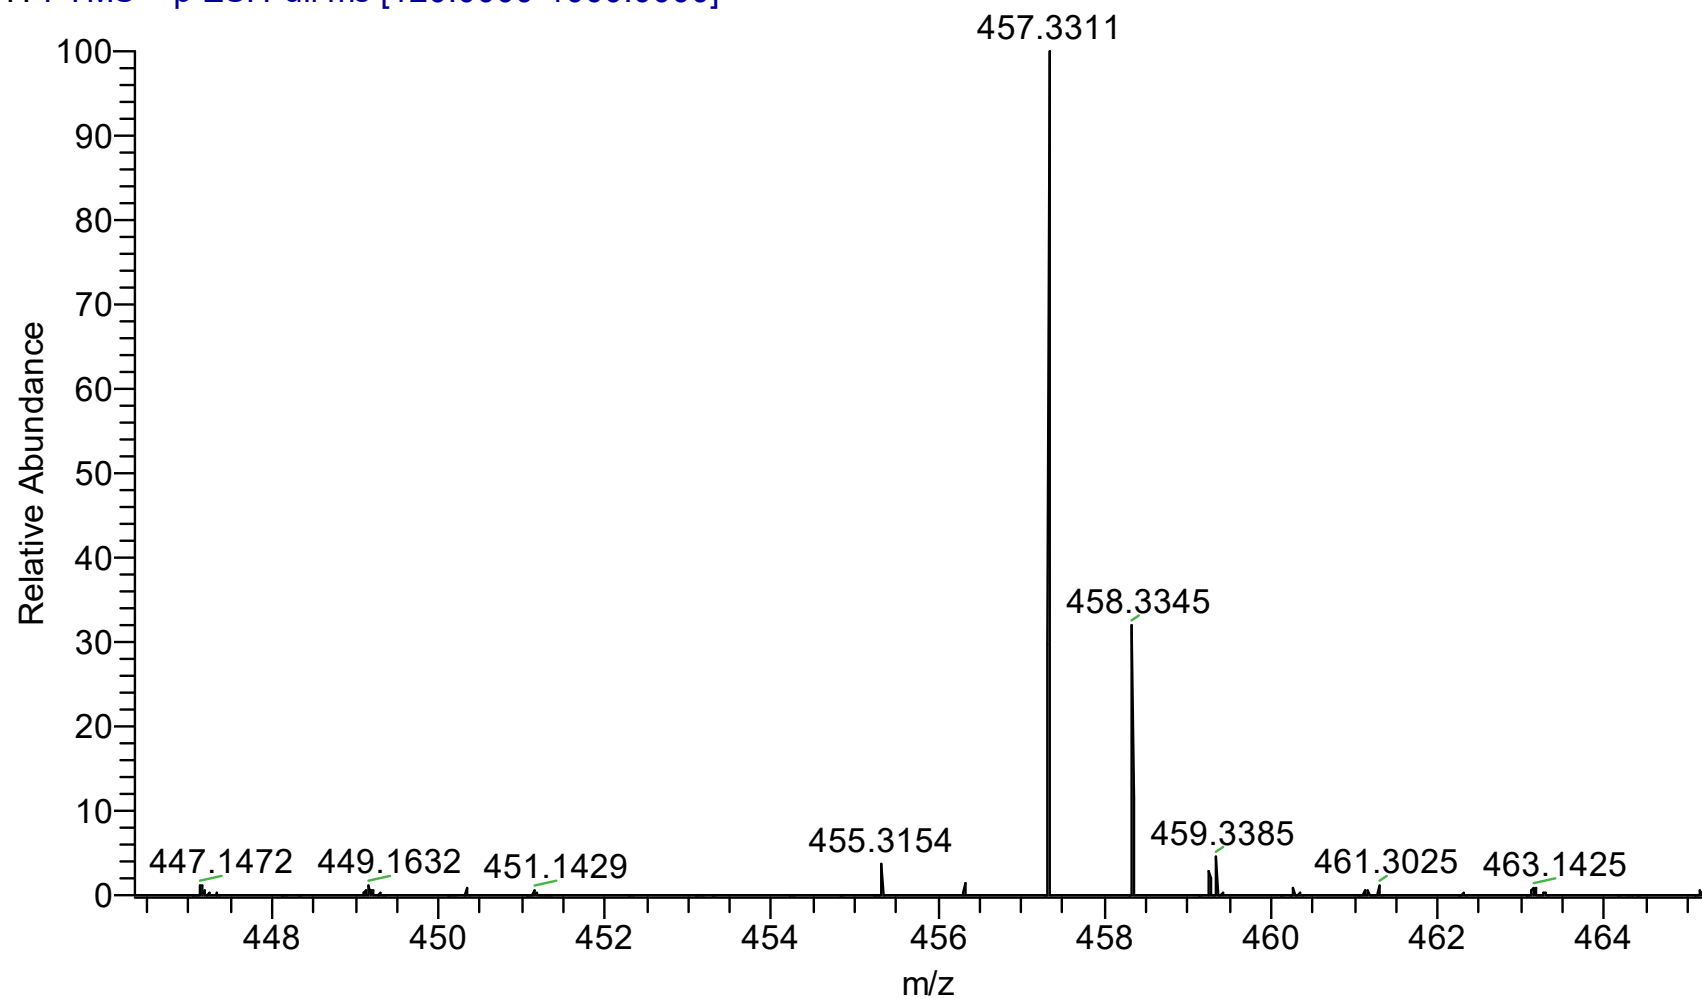

| m/z      | Theo. Mass | Delta (mmu) | RDB equiv. | Composition                                    |
|----------|------------|-------------|------------|------------------------------------------------|
| 457.3311 | 457.3312   | -0.14       | 7.5        | C <sub>29</sub> H <sub>45</sub> O <sub>4</sub> |

Figure S7. HR-ESI-MS of compound 1

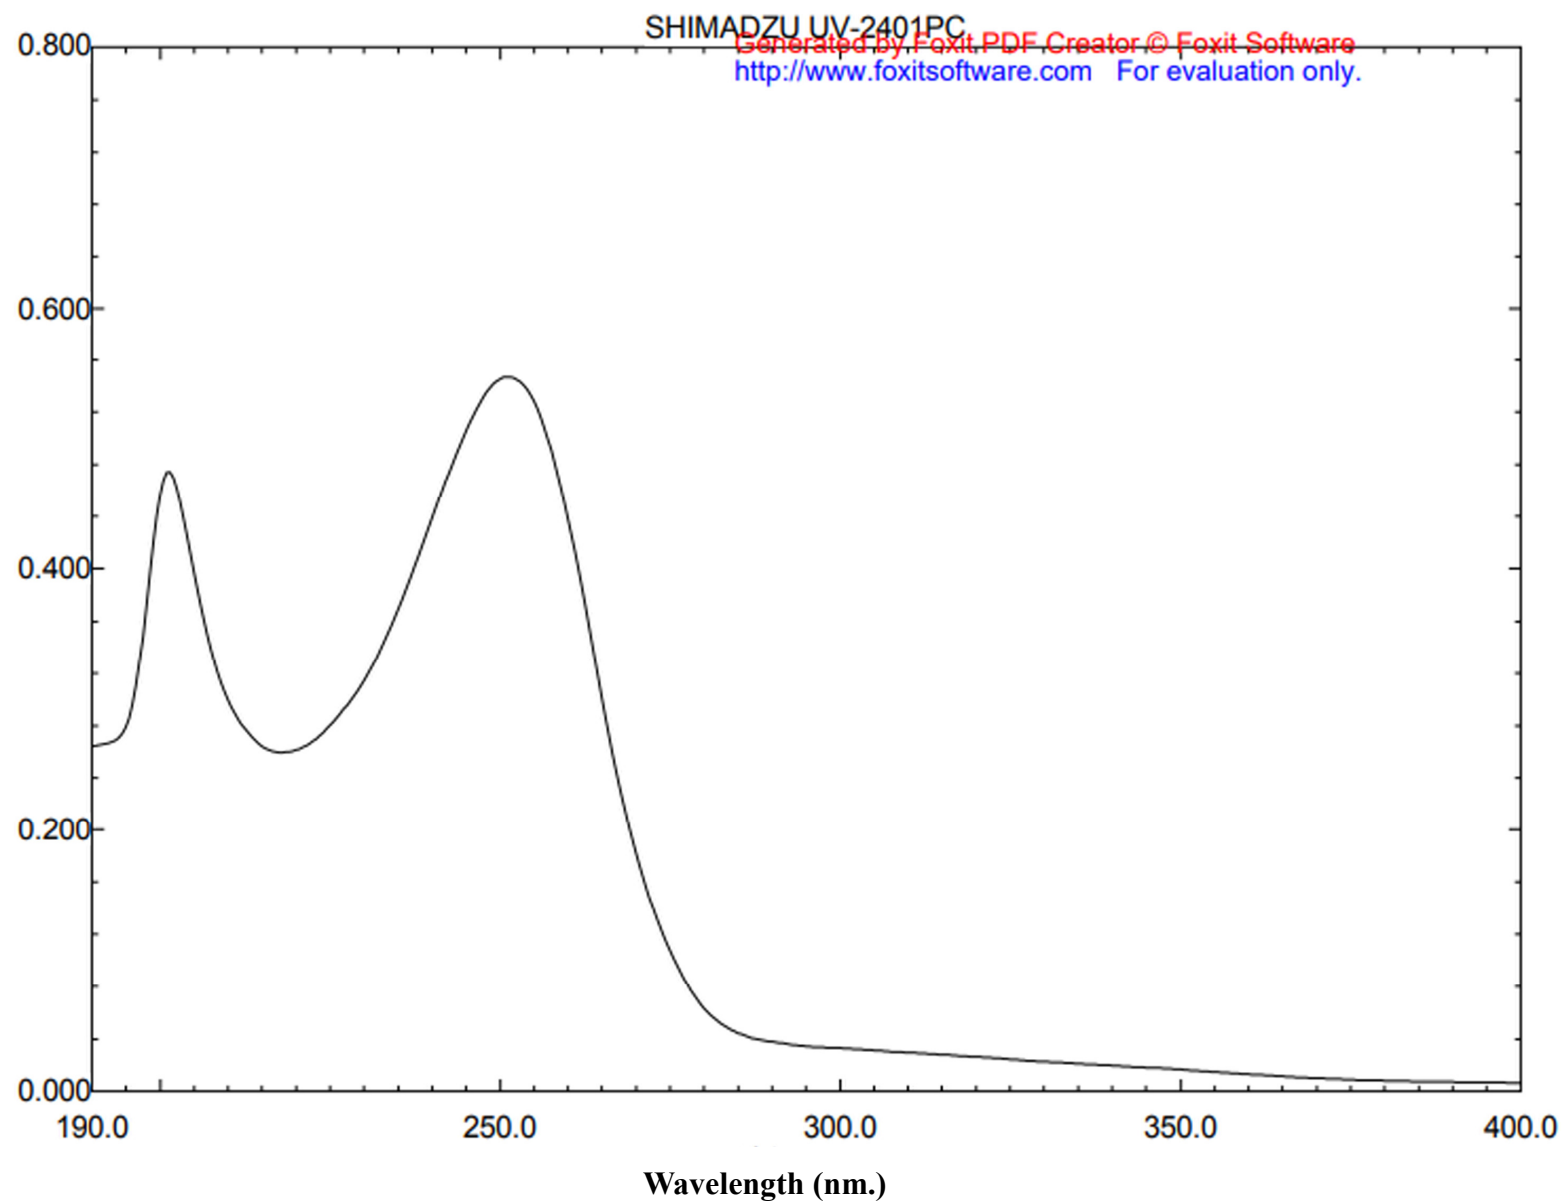

Figure S8.UV spectrum of compound 1

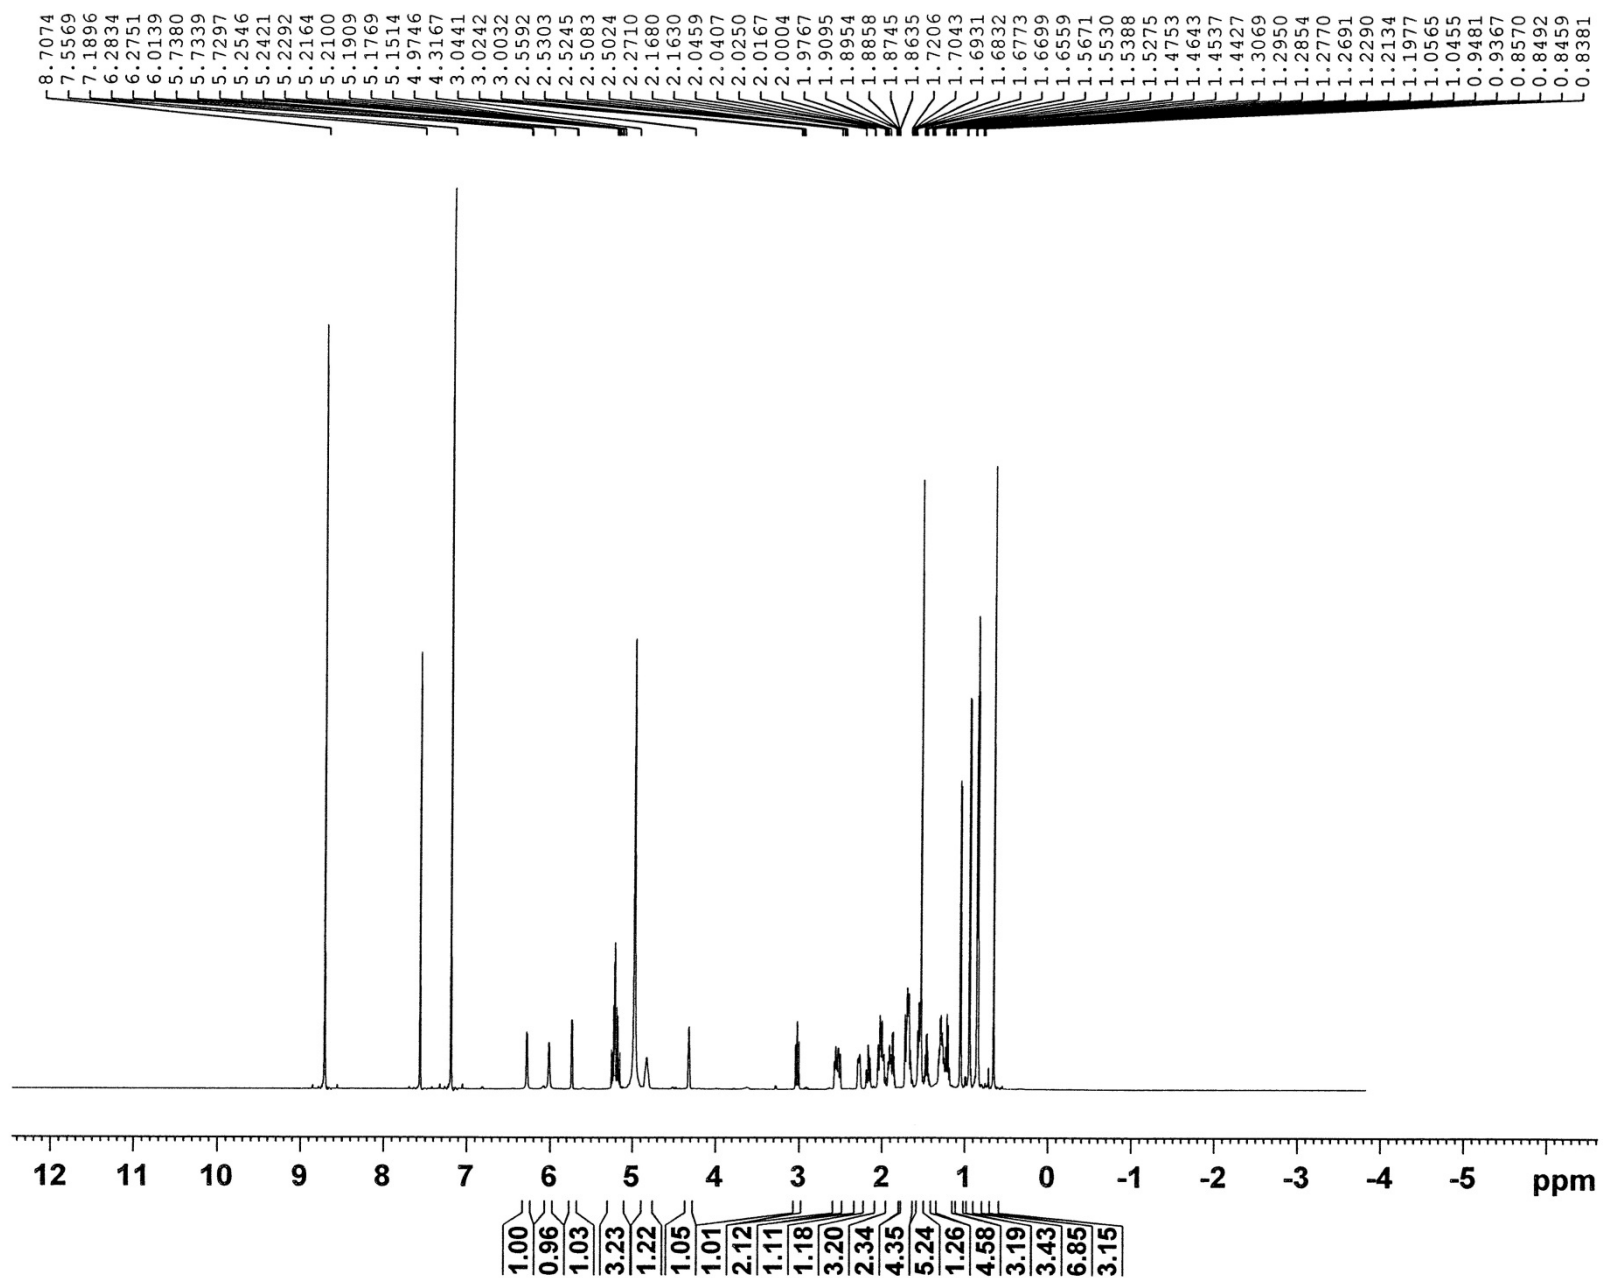

Figure S9.  $^1\text{H}$  NMR spectrum of compound 2

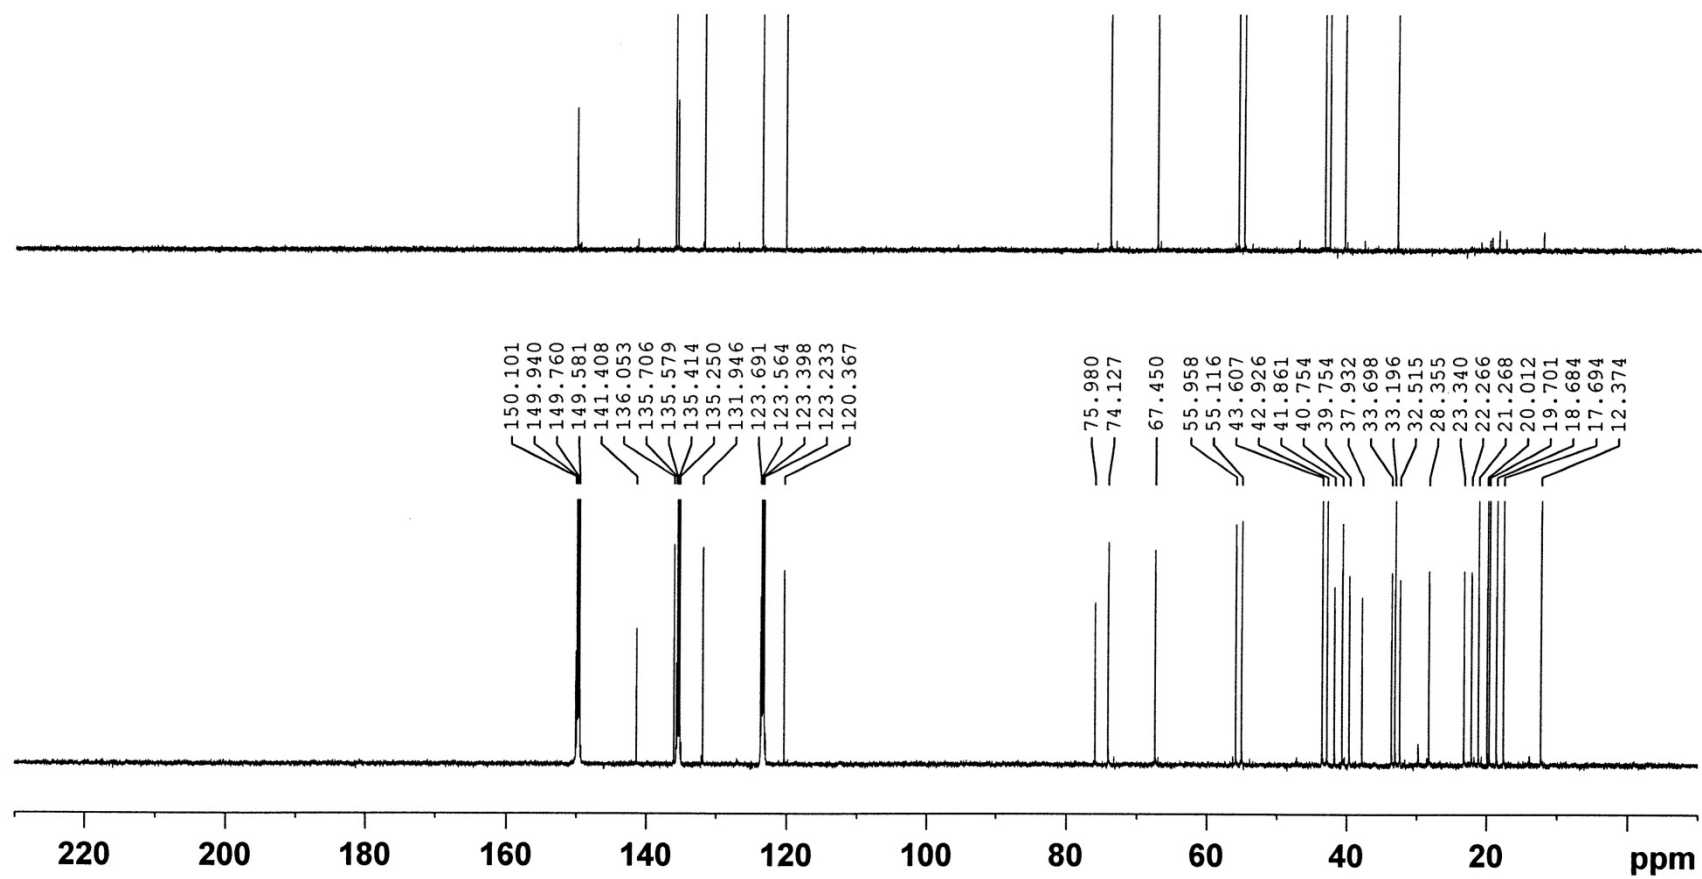

Figure S10.  $^{13}\text{C}$  NMR spectrum of compound 2

T: FTMS + p ESI Full ms [120.0000-1000.0000]

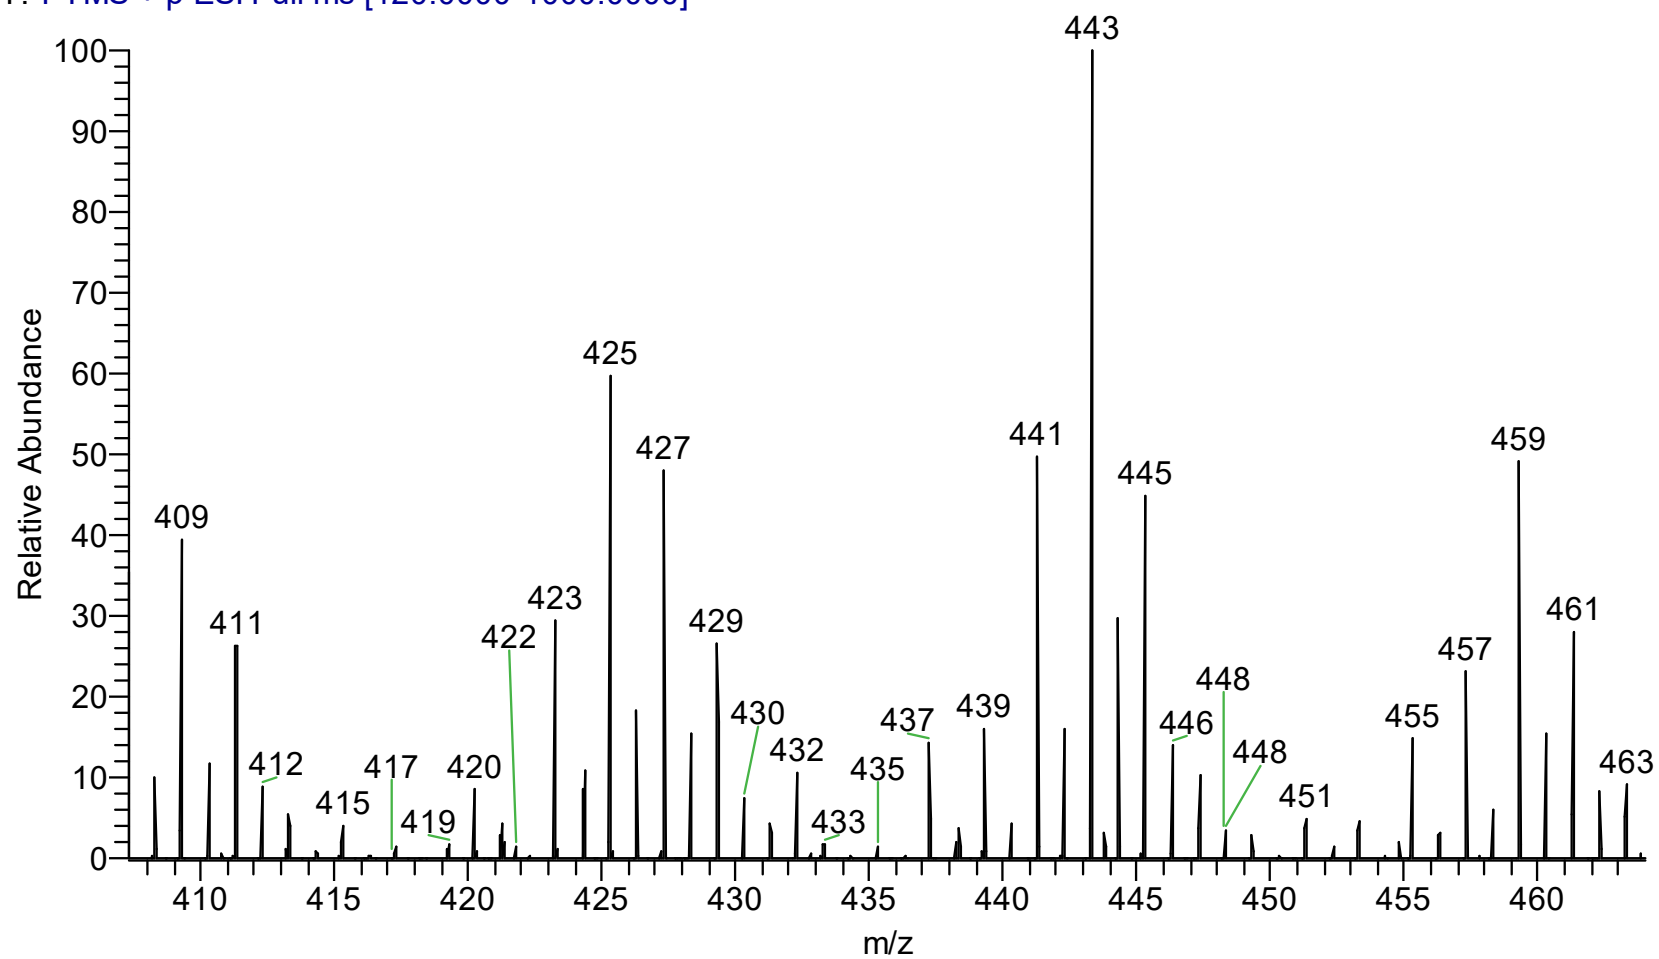

Figure S11. ESI-MS spectrum of compound 2

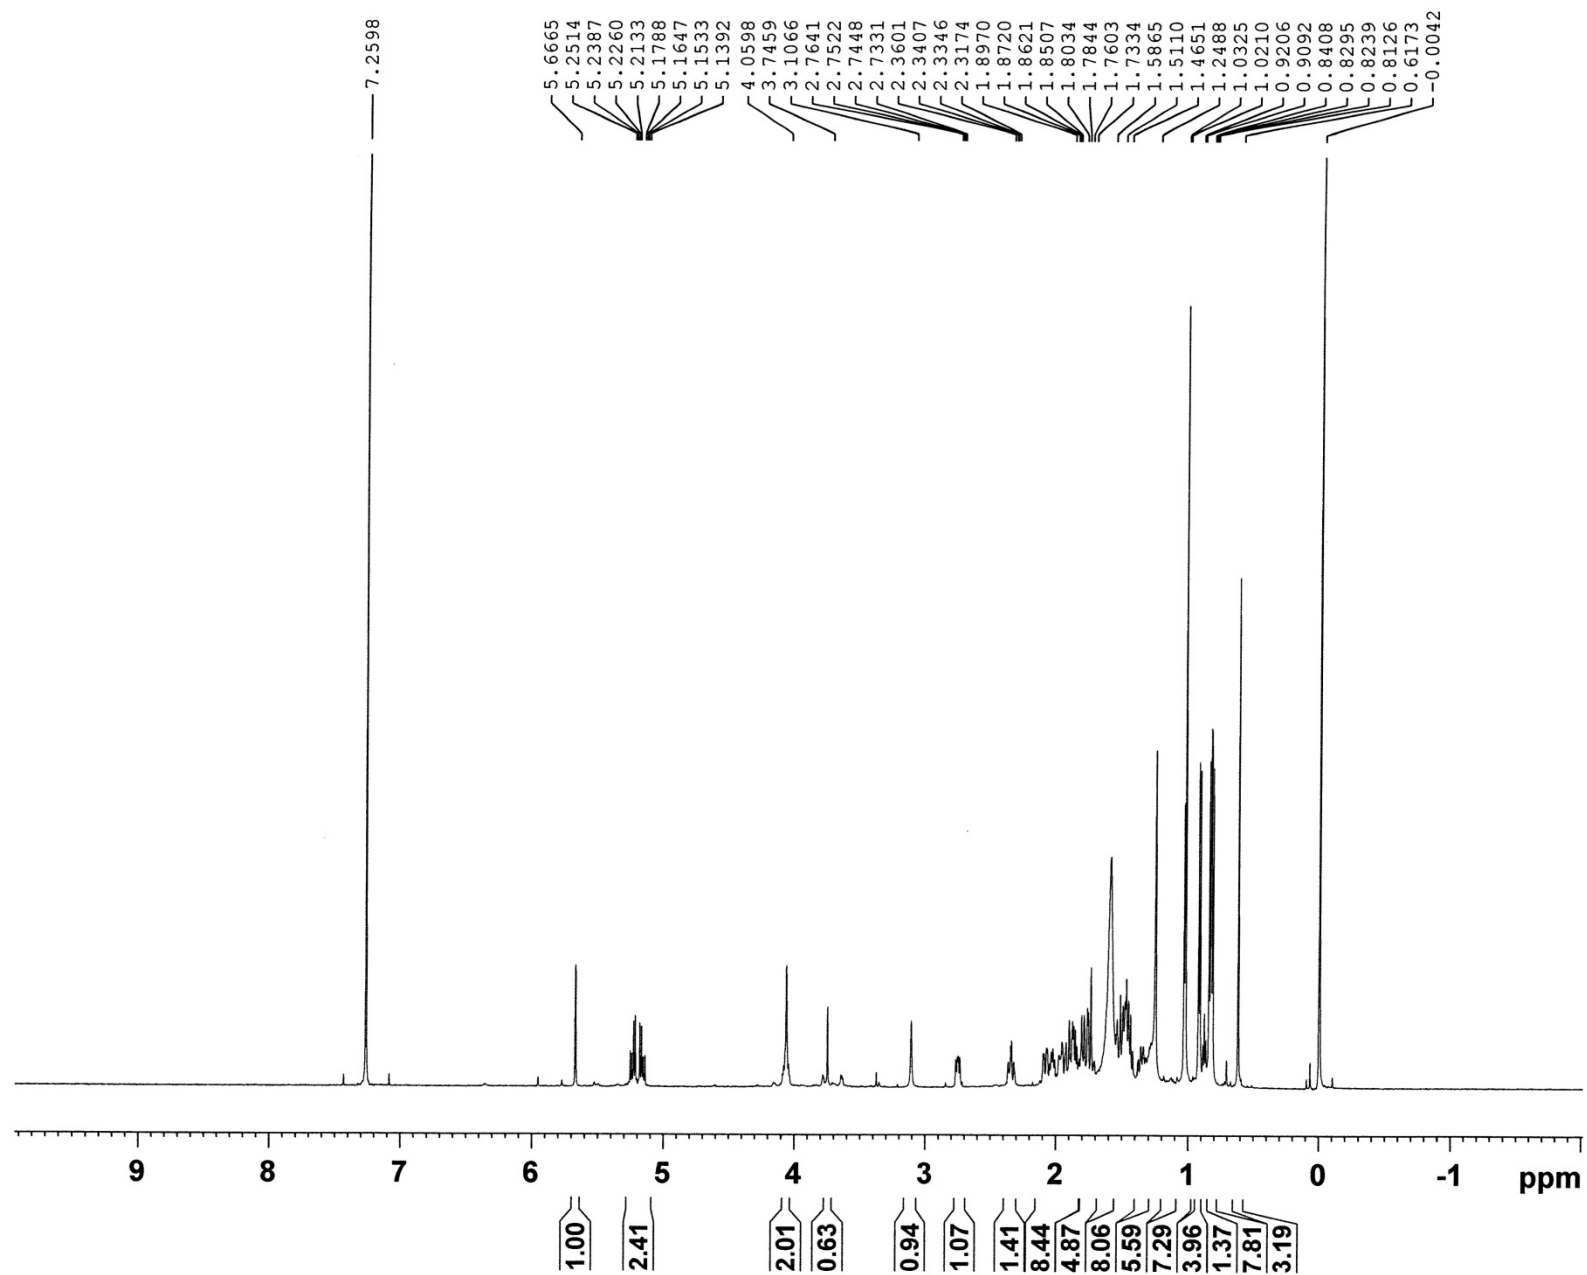

Figure S12.  $^1\text{H}$  NMR spectrum of compound 3

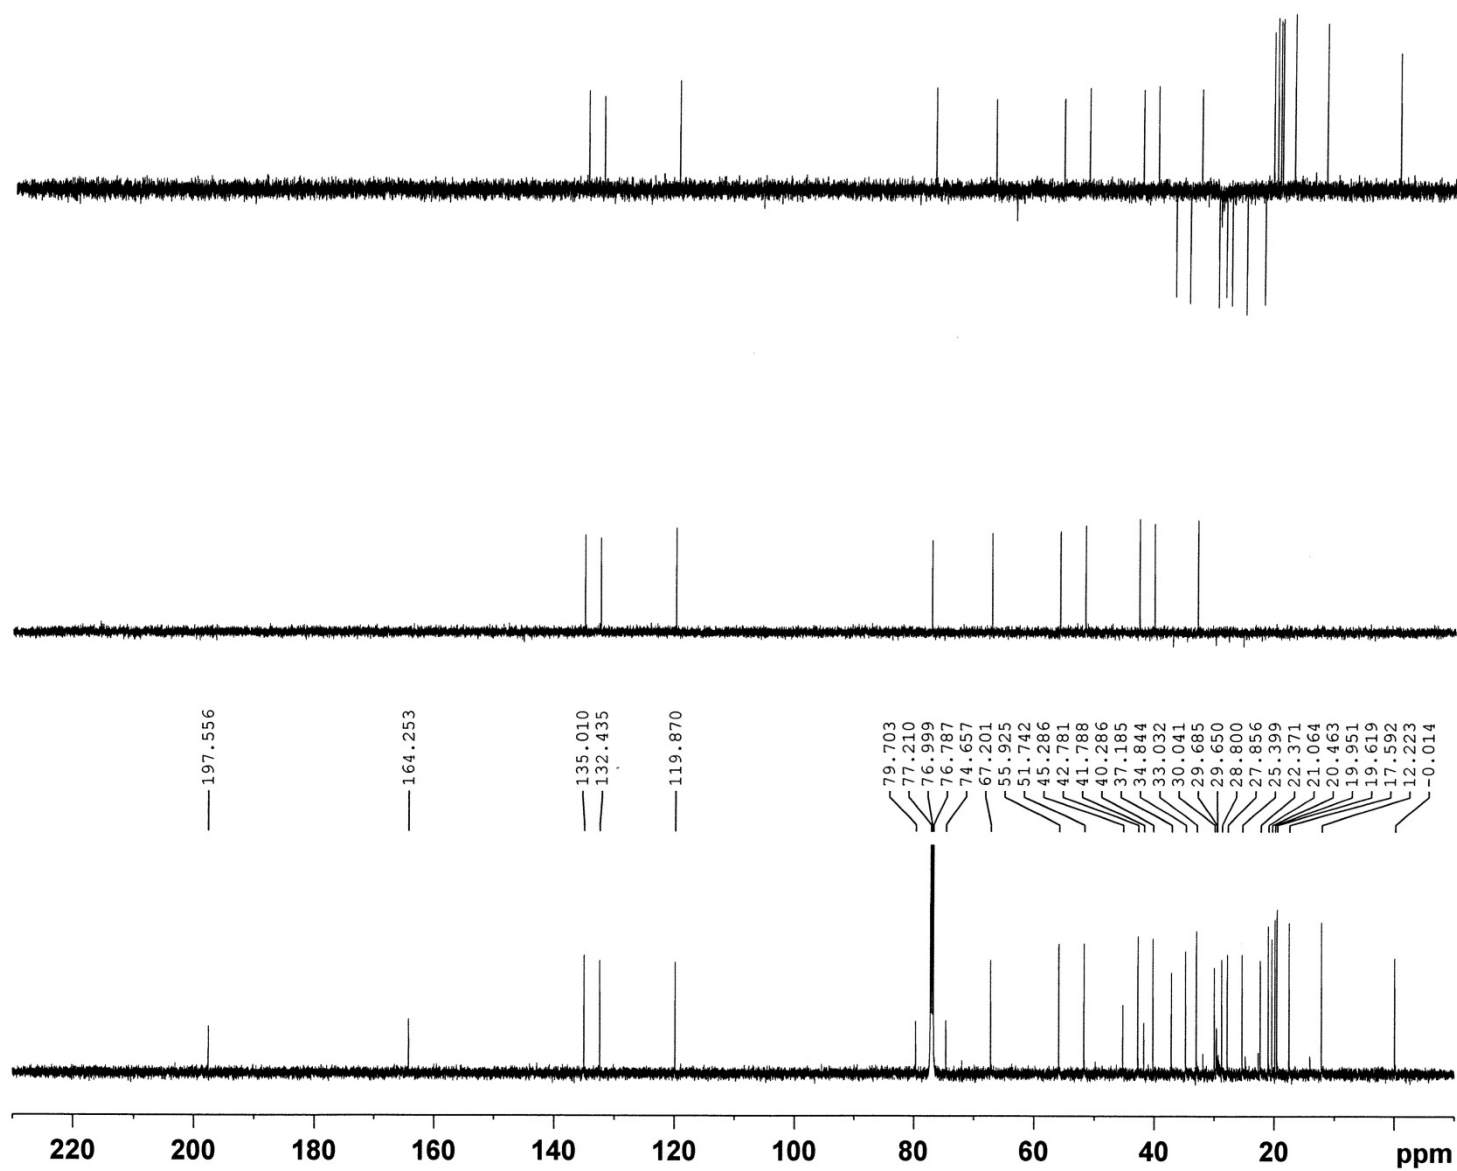

Figure S13.  $^{13}\text{C}$  NMR spectrum of compound 3

T: FTMS + p ESI Full ms [120.0000-1000.0000]

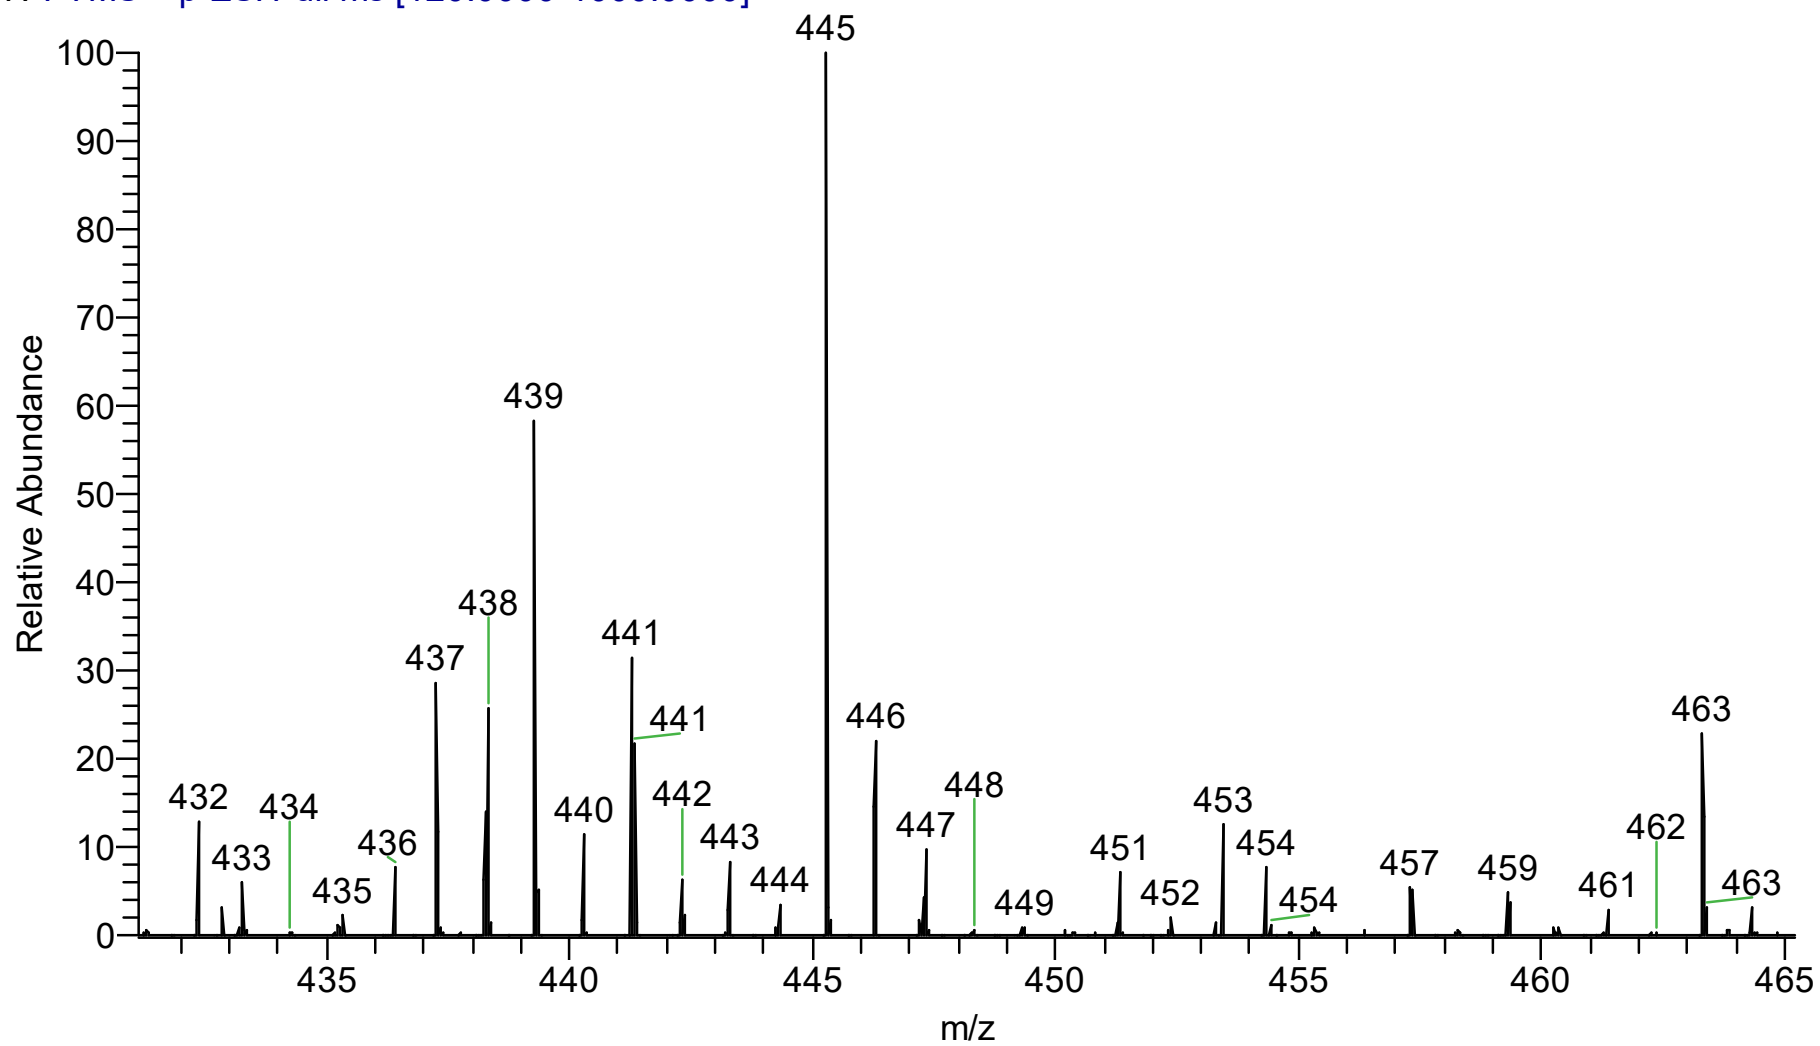

Figure S14. ESI-MS spectrum of compound 3



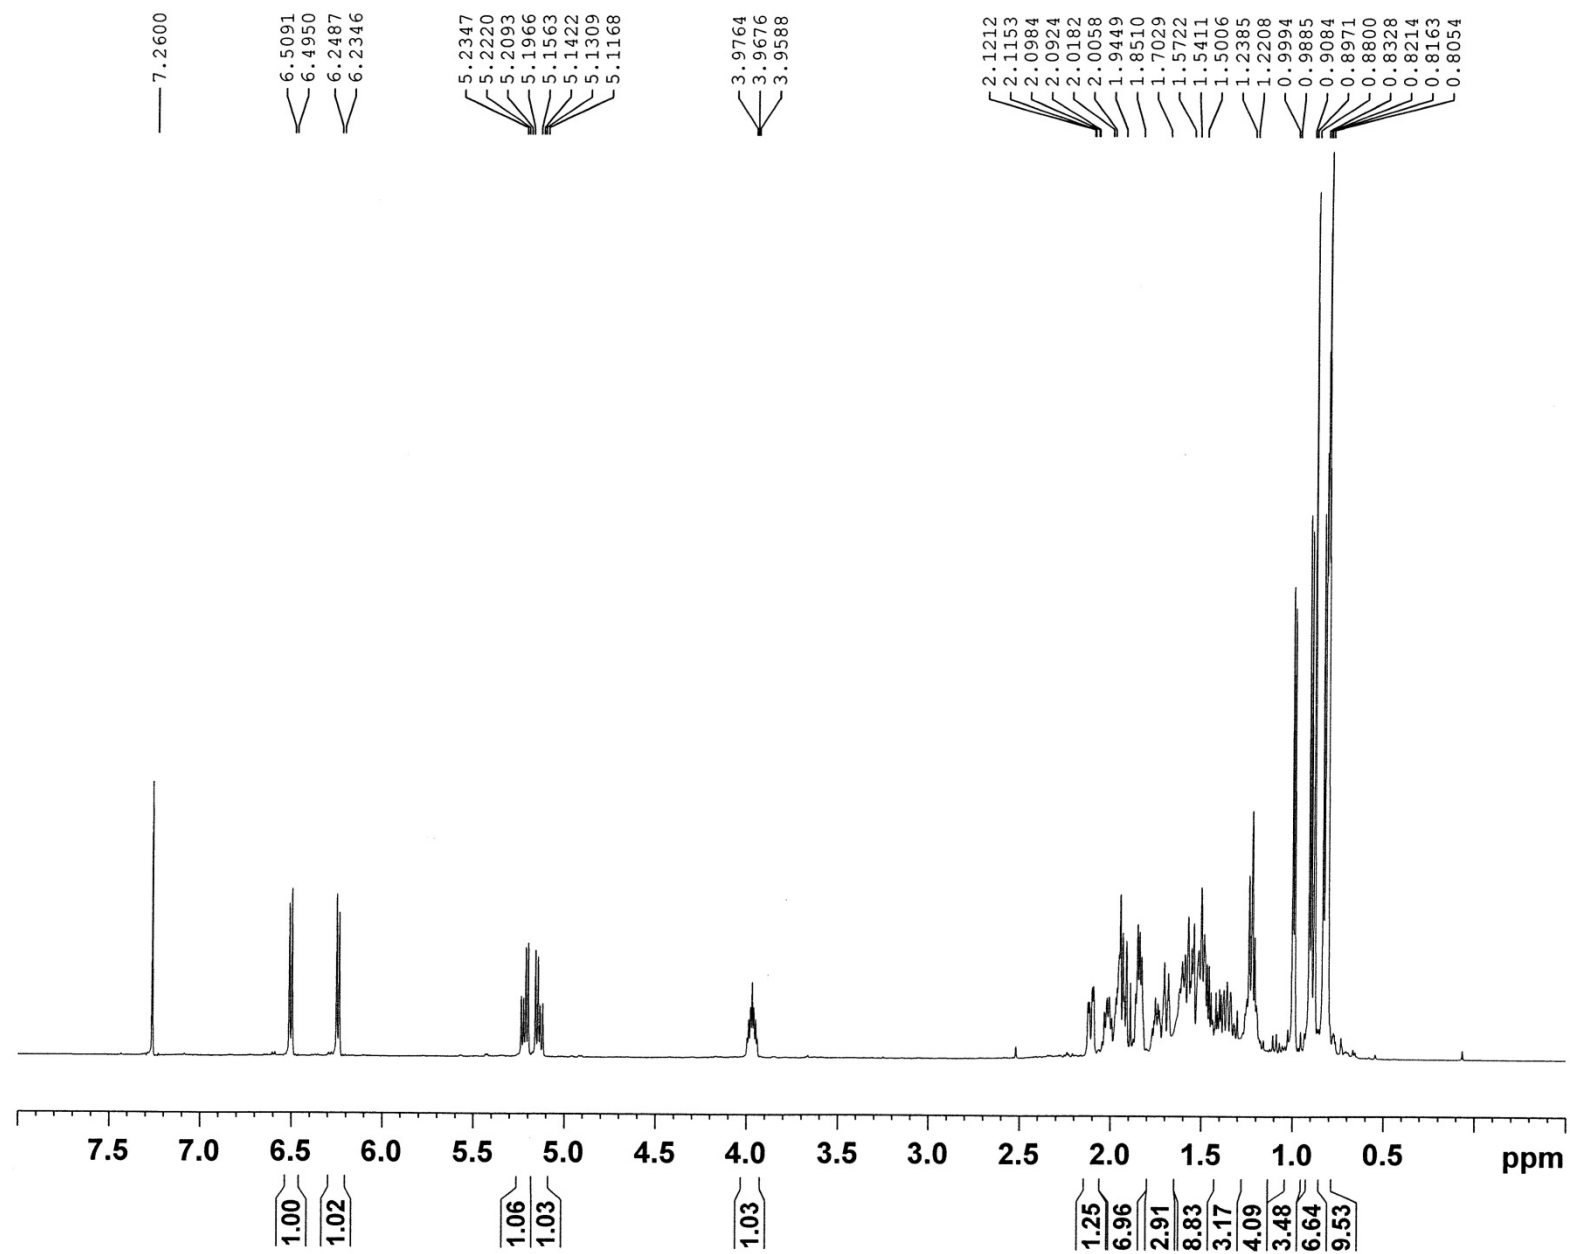

Figure S15.  $^1\text{H}$  NMR spectrum of compound **4**

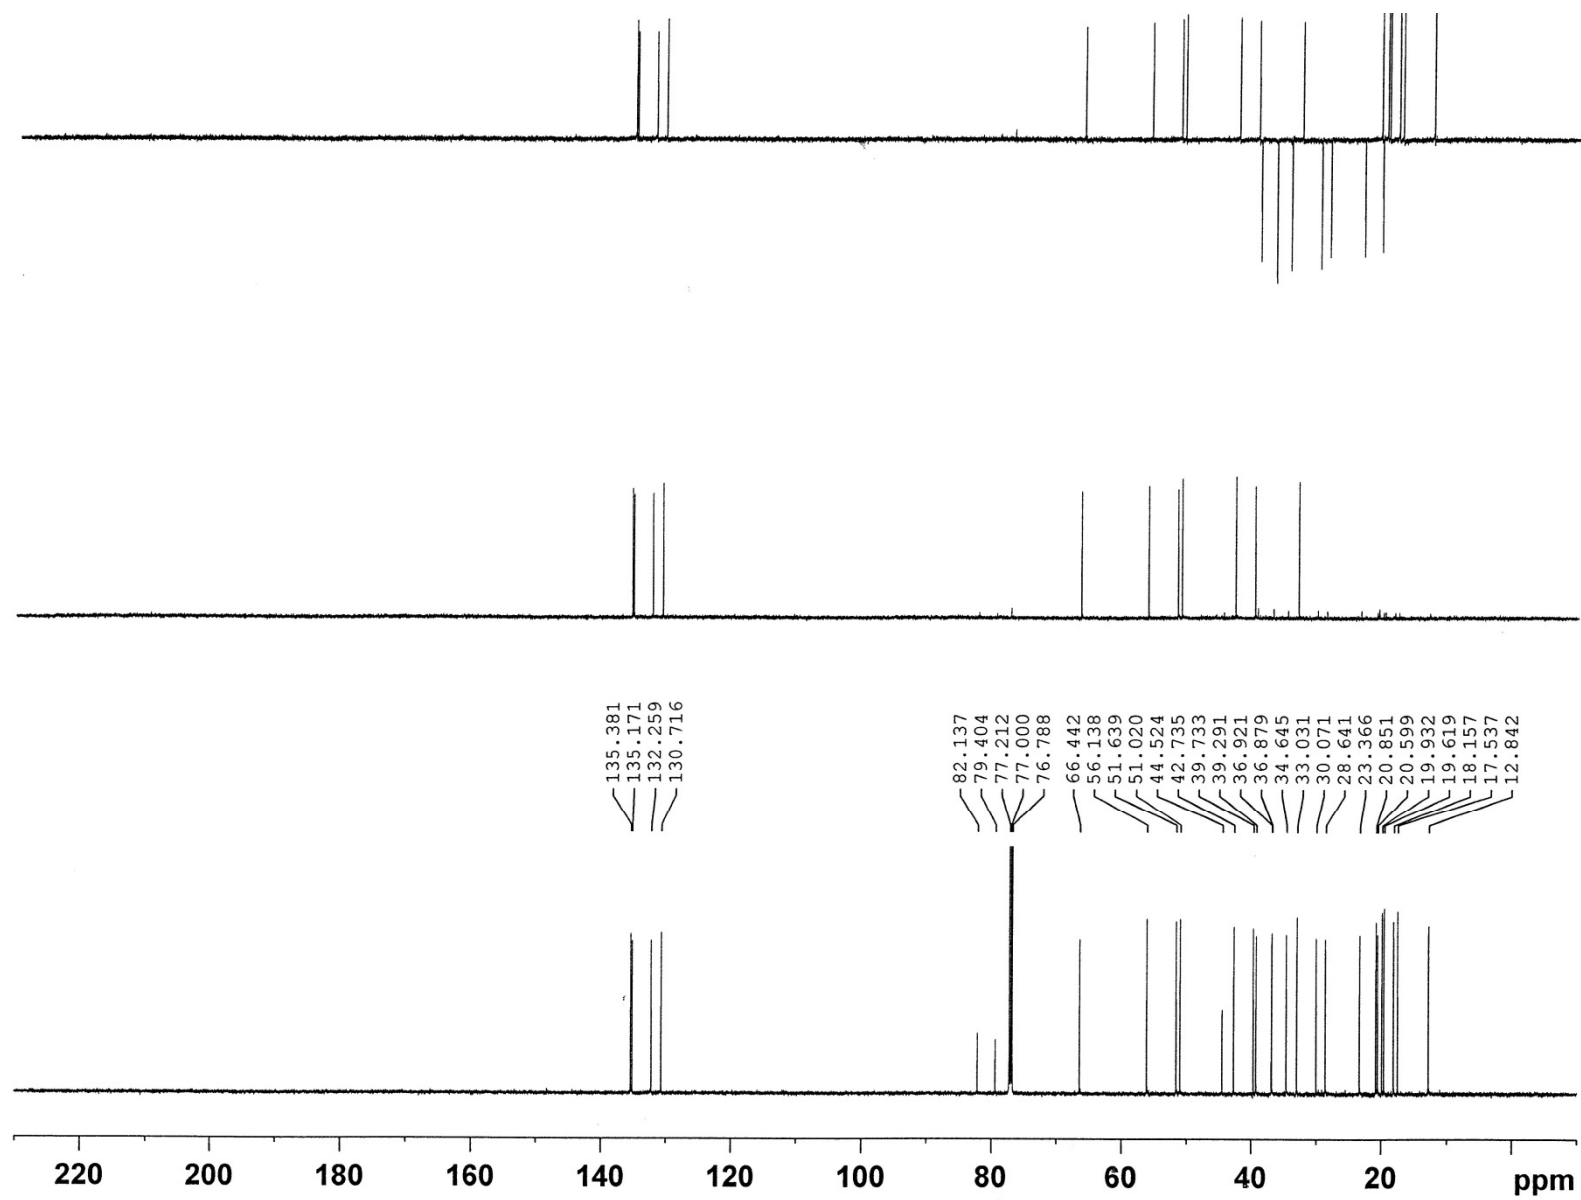

Figure S16.  $^{13}\text{C}$  NMR spectrum of compound 4

T: FTMS + p ESI Full ms [70.0000-1050.0000]

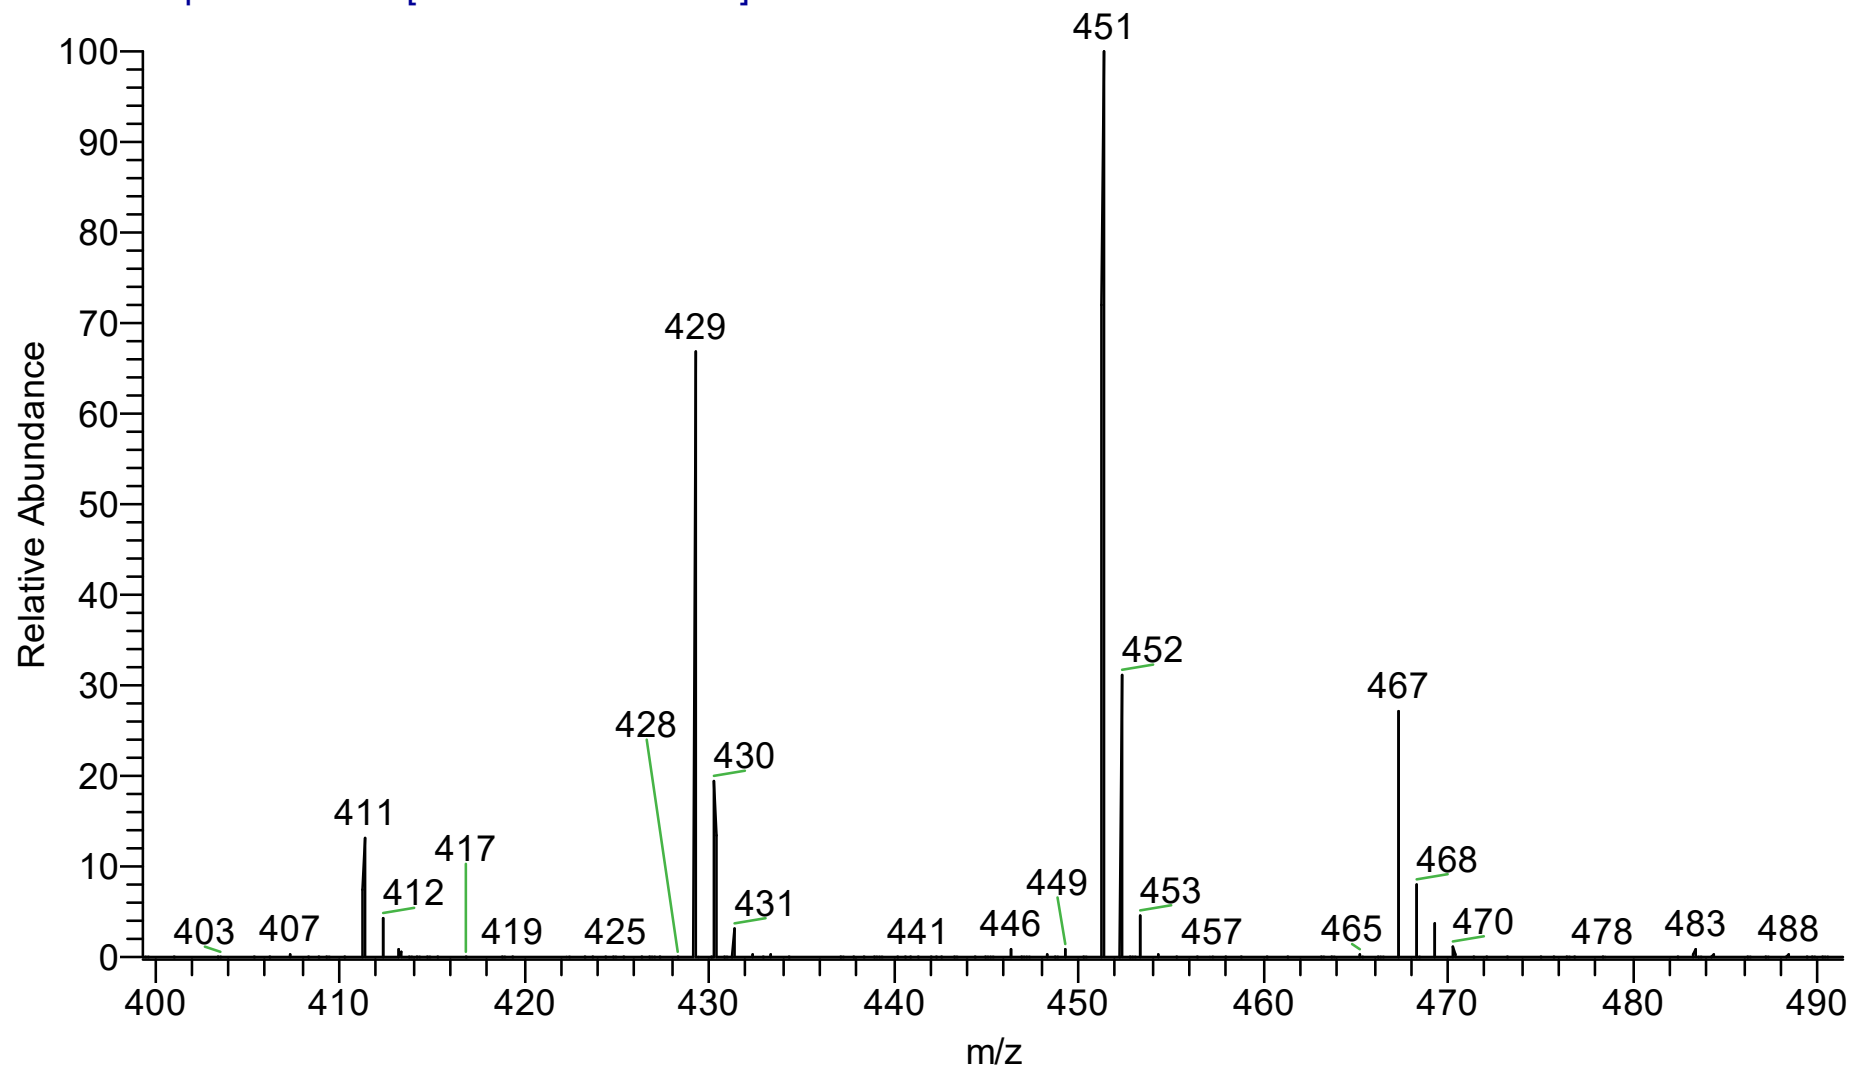

Figure S17. ESI-MS spectrum of compound 4

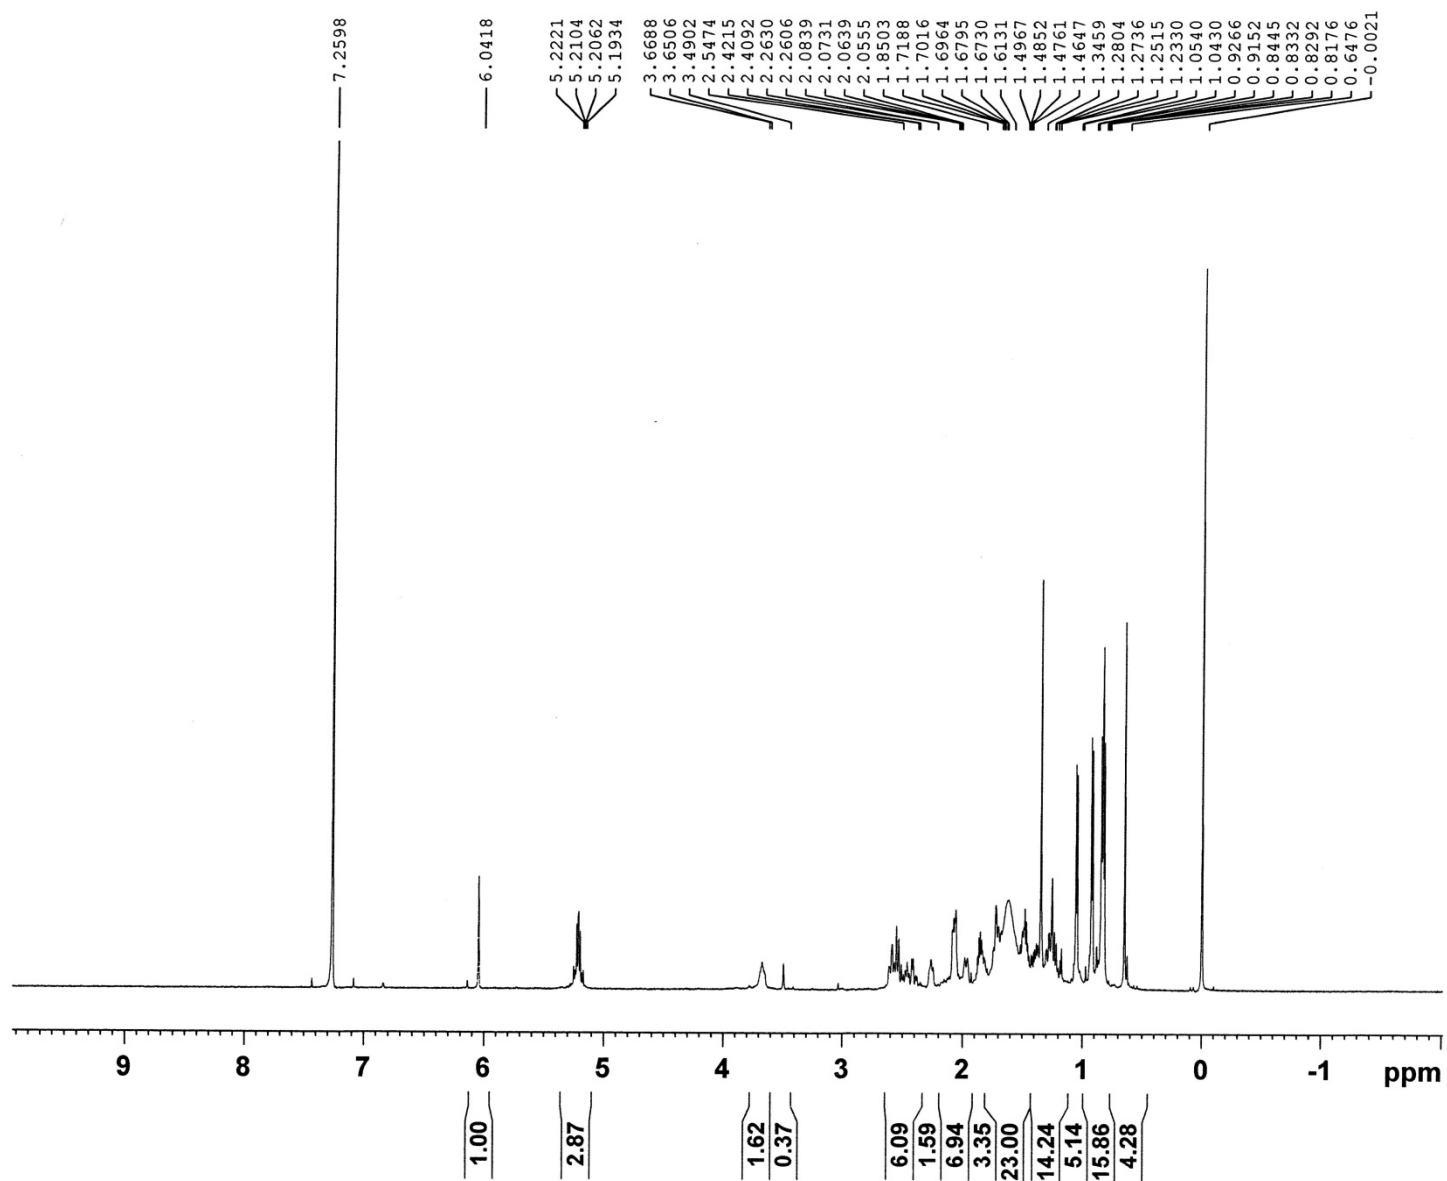

Figure S18.  $^1\text{H}$  NMR spectrum of compound **5**

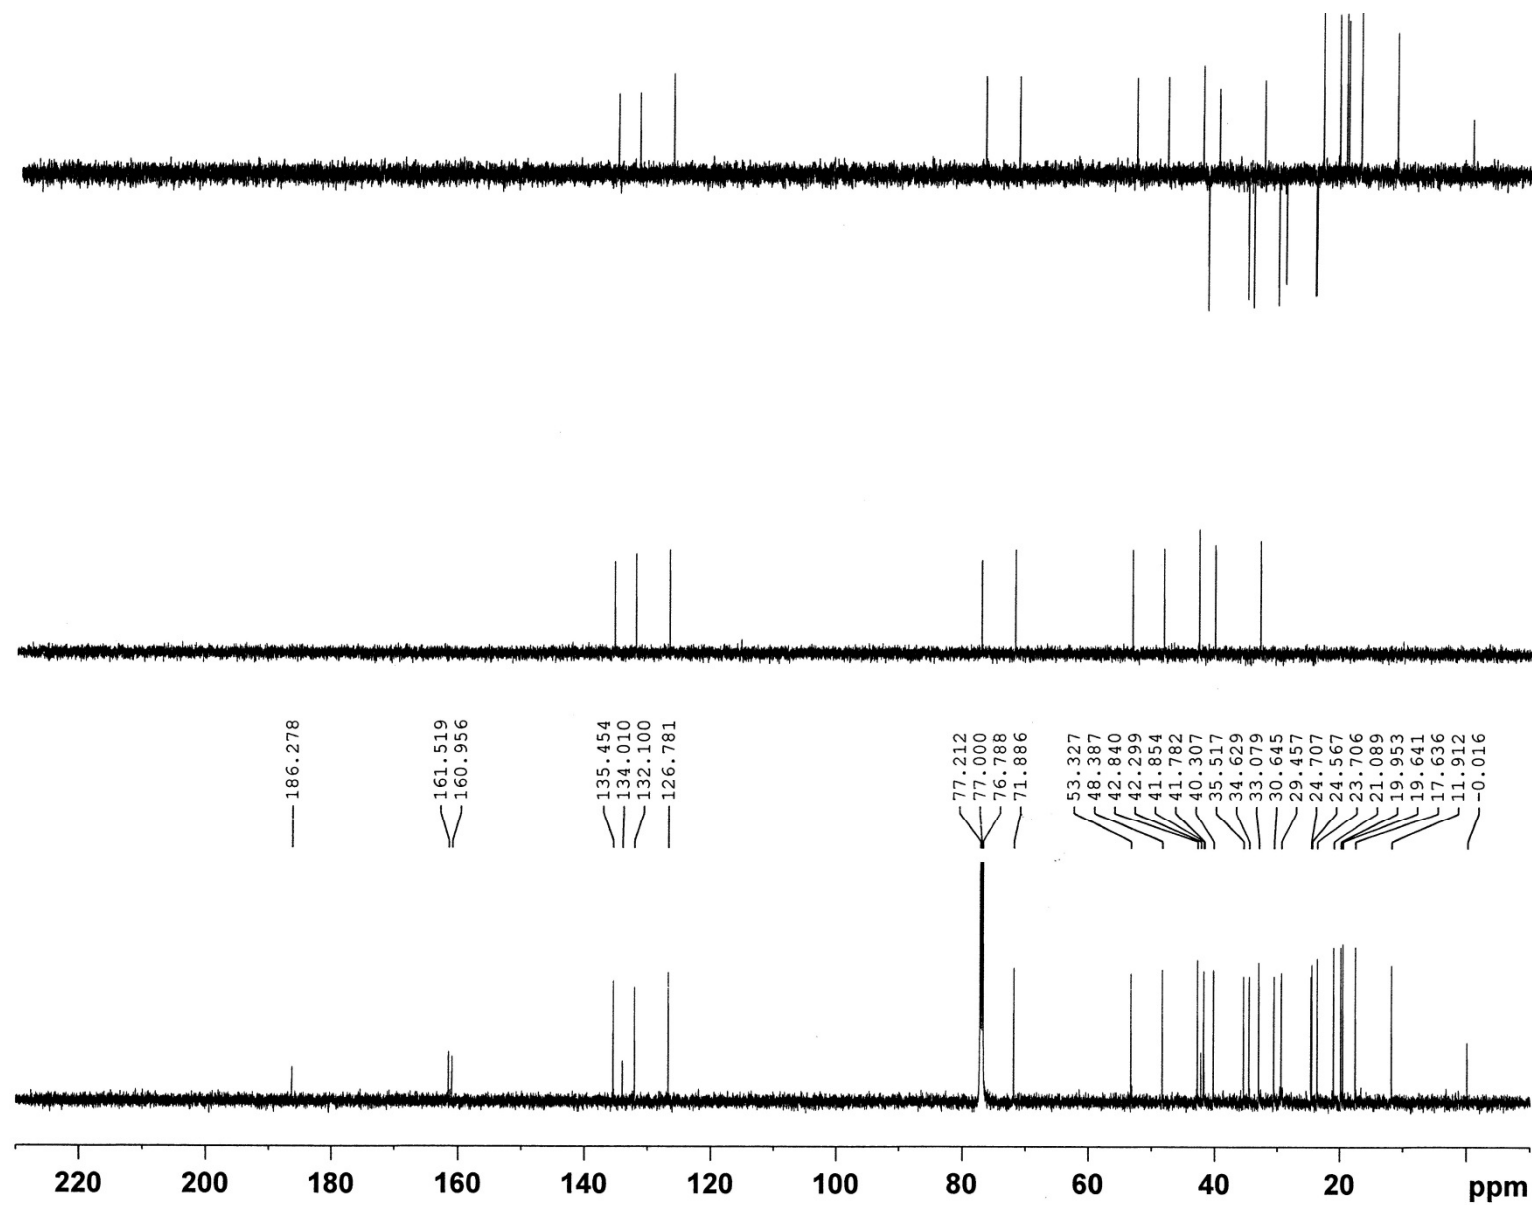

Figure S19.  $^{13}\text{C}$  NMR spectrum of compound 5

T: FTMS + p ESI Full ms [120.0000-1000.0000]

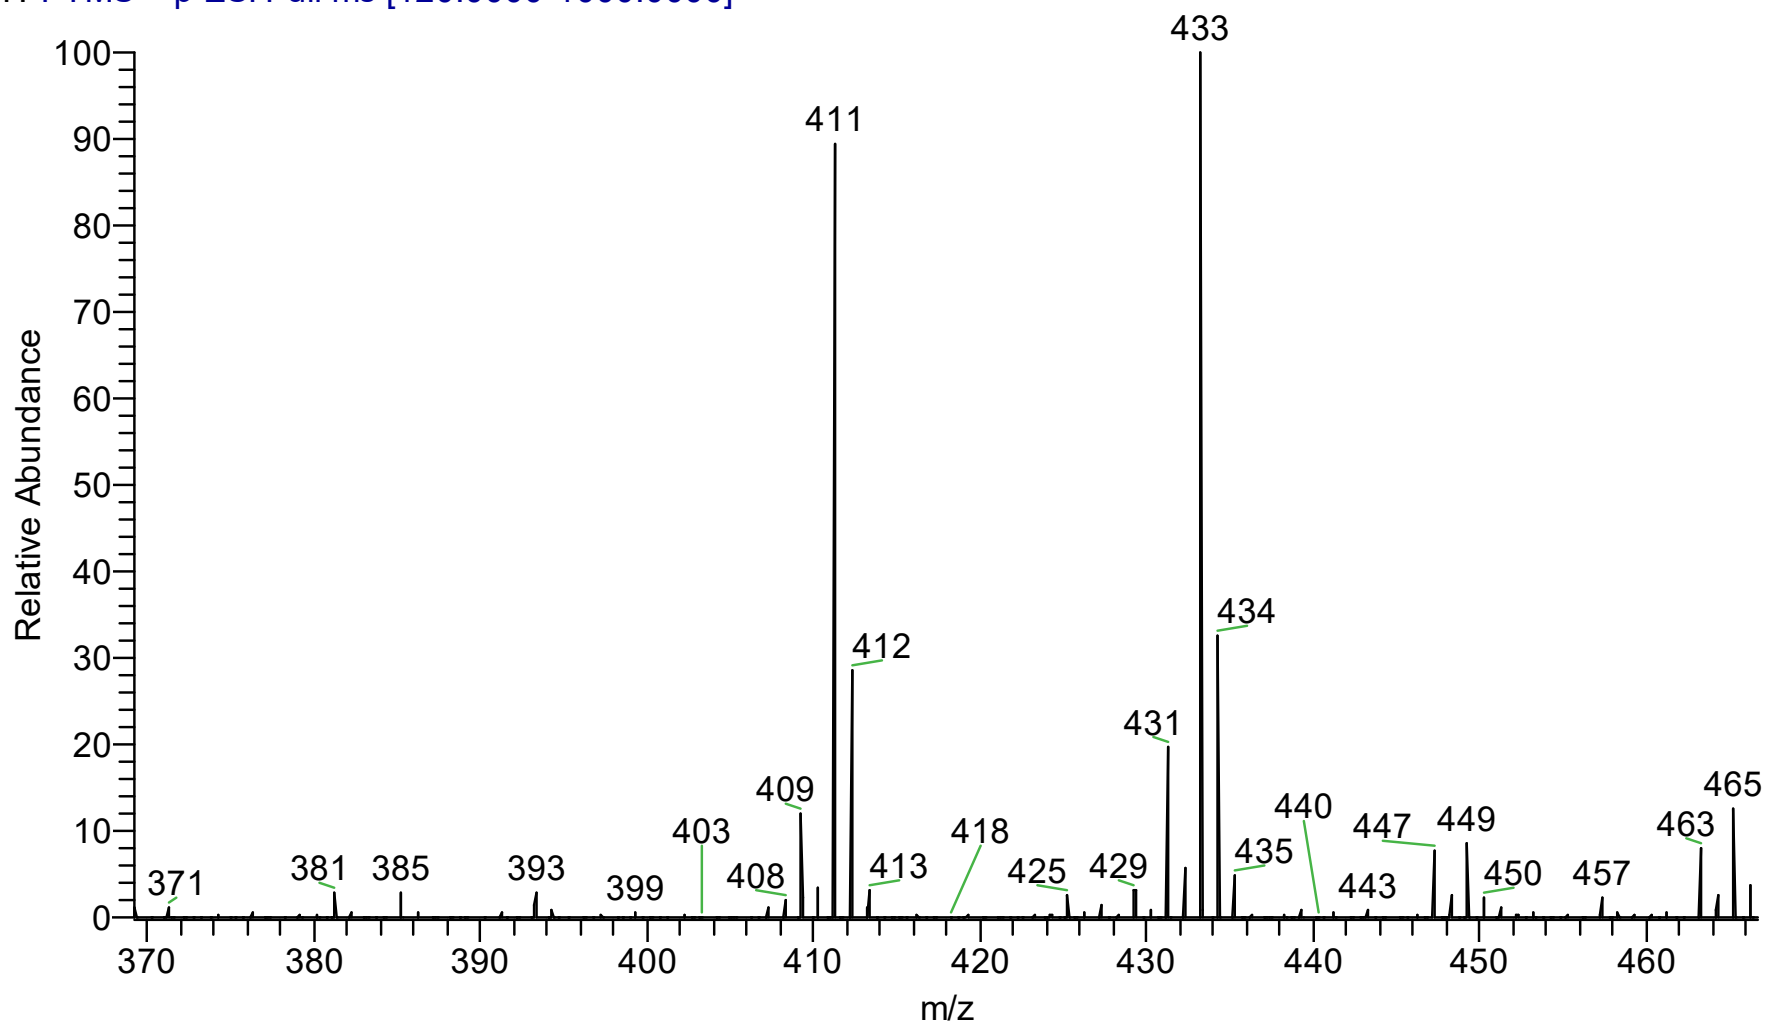

Figure S20. ESI-MS spectrum of compound 5

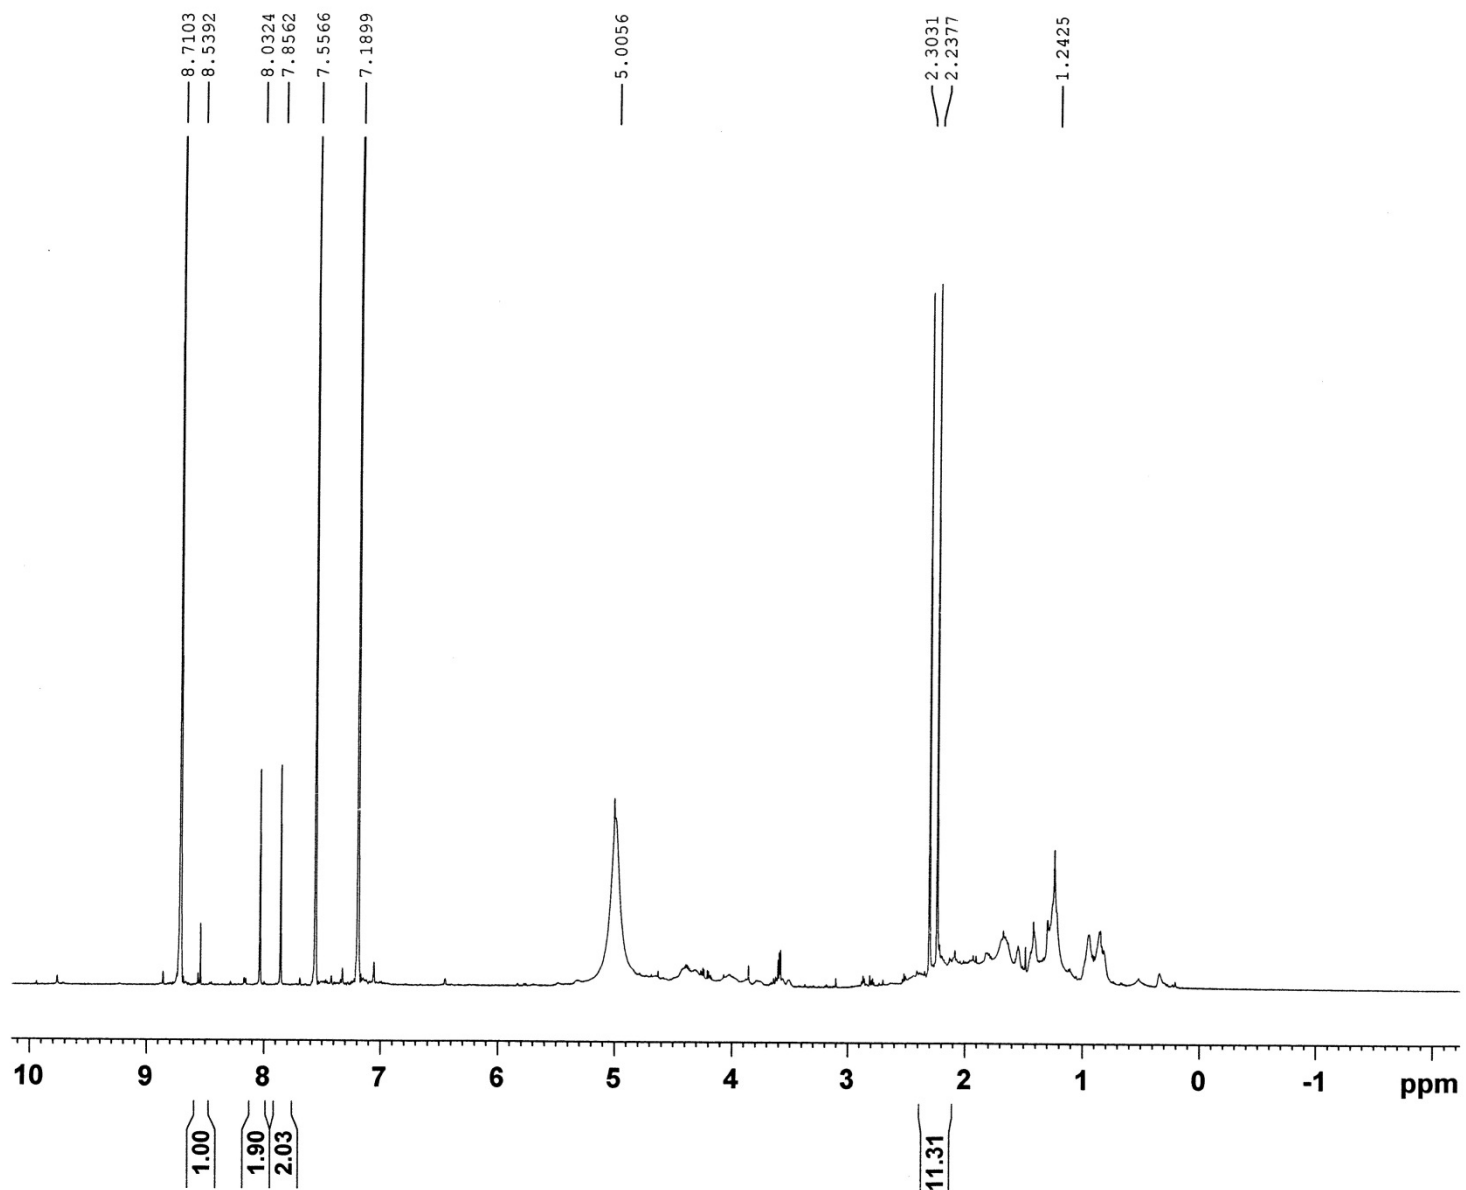

Figure S21. <sup>1</sup>H NMR spectrum of compound 6





T: FTMS + p ESI Full ms [120.0000-1000.0000]

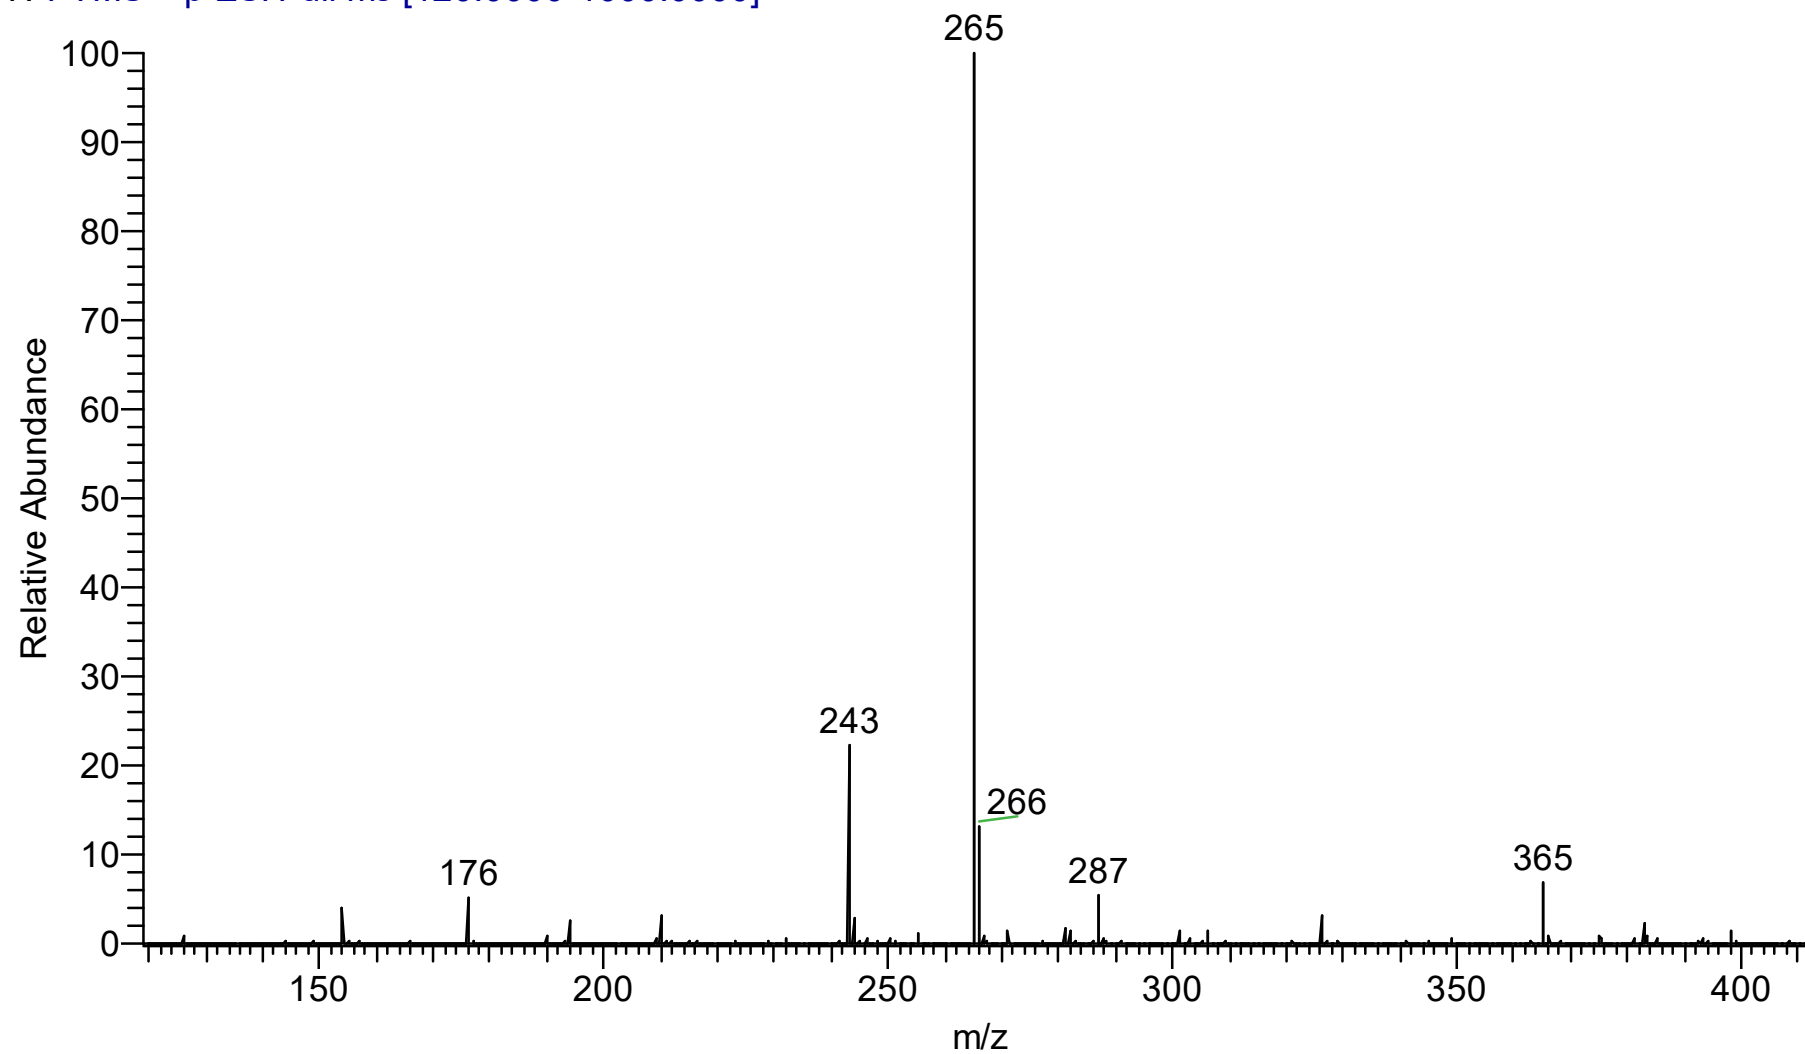

Figure S23. ESI-MS spectrum of compound 6

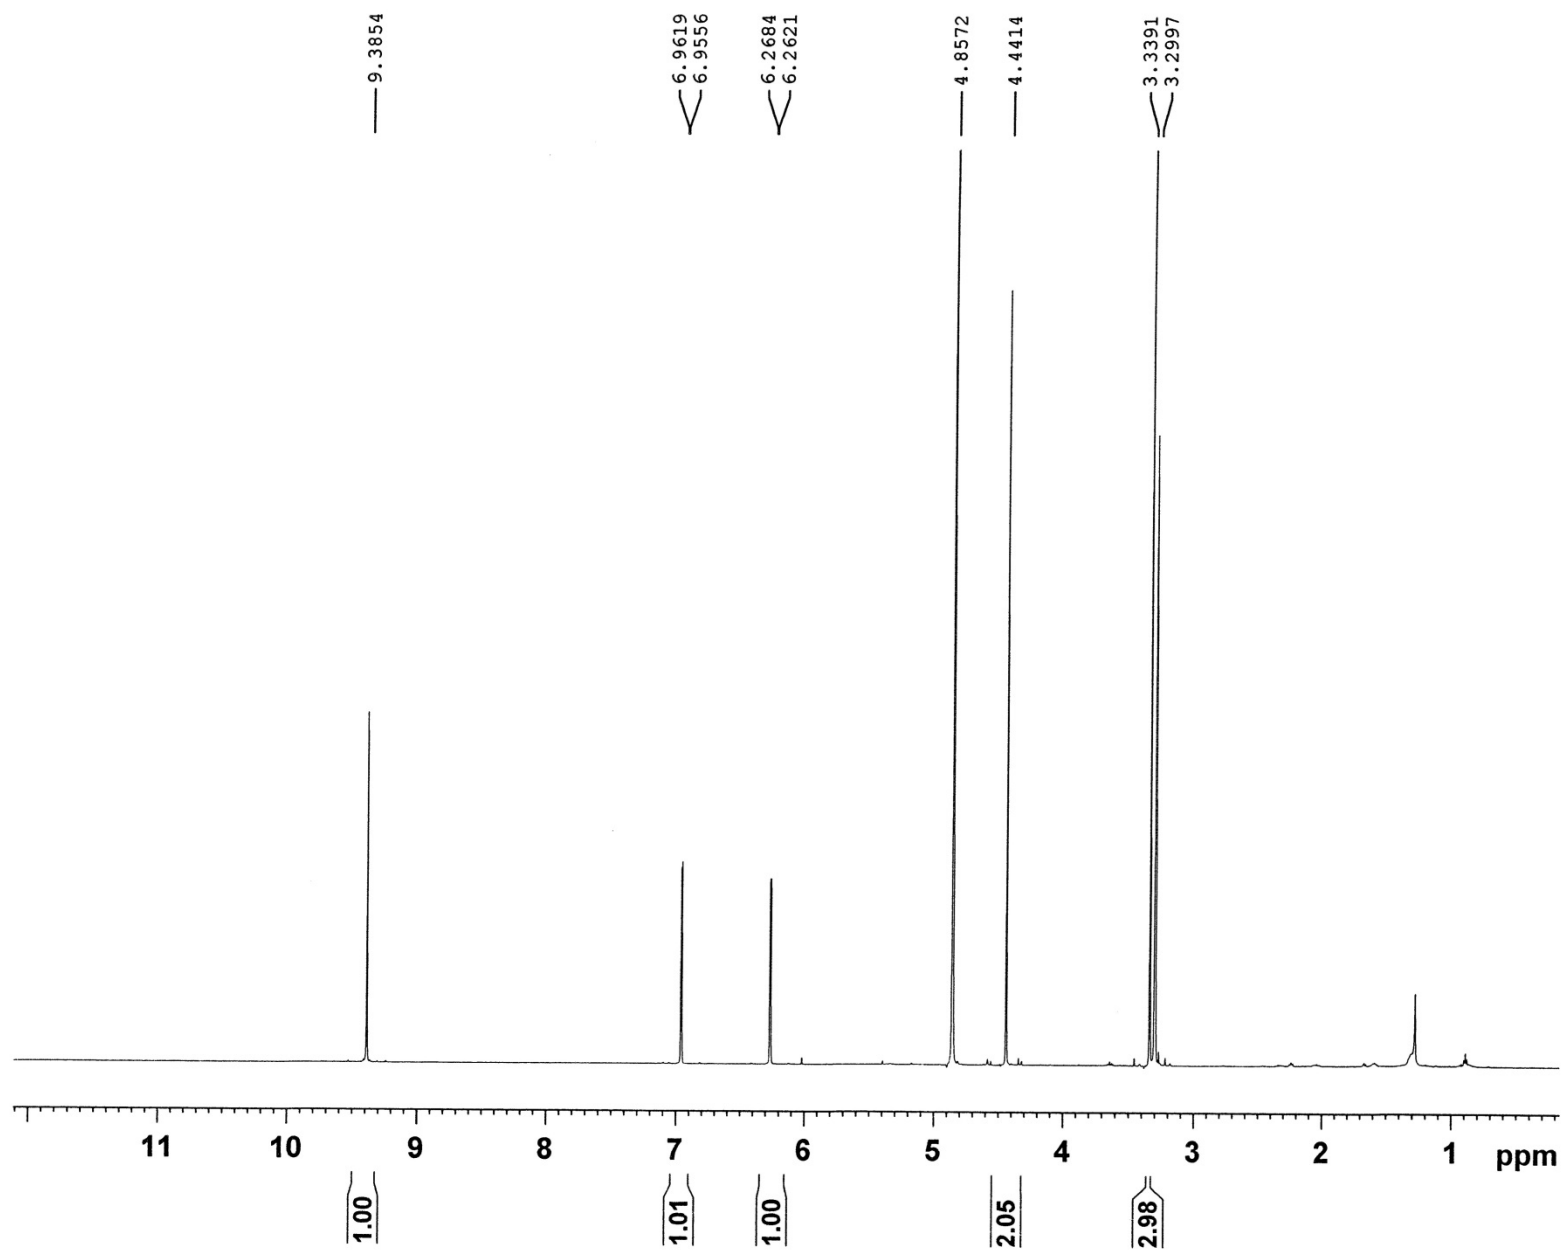

Figure S24. <sup>1</sup>H NMR spectrum of compound 7

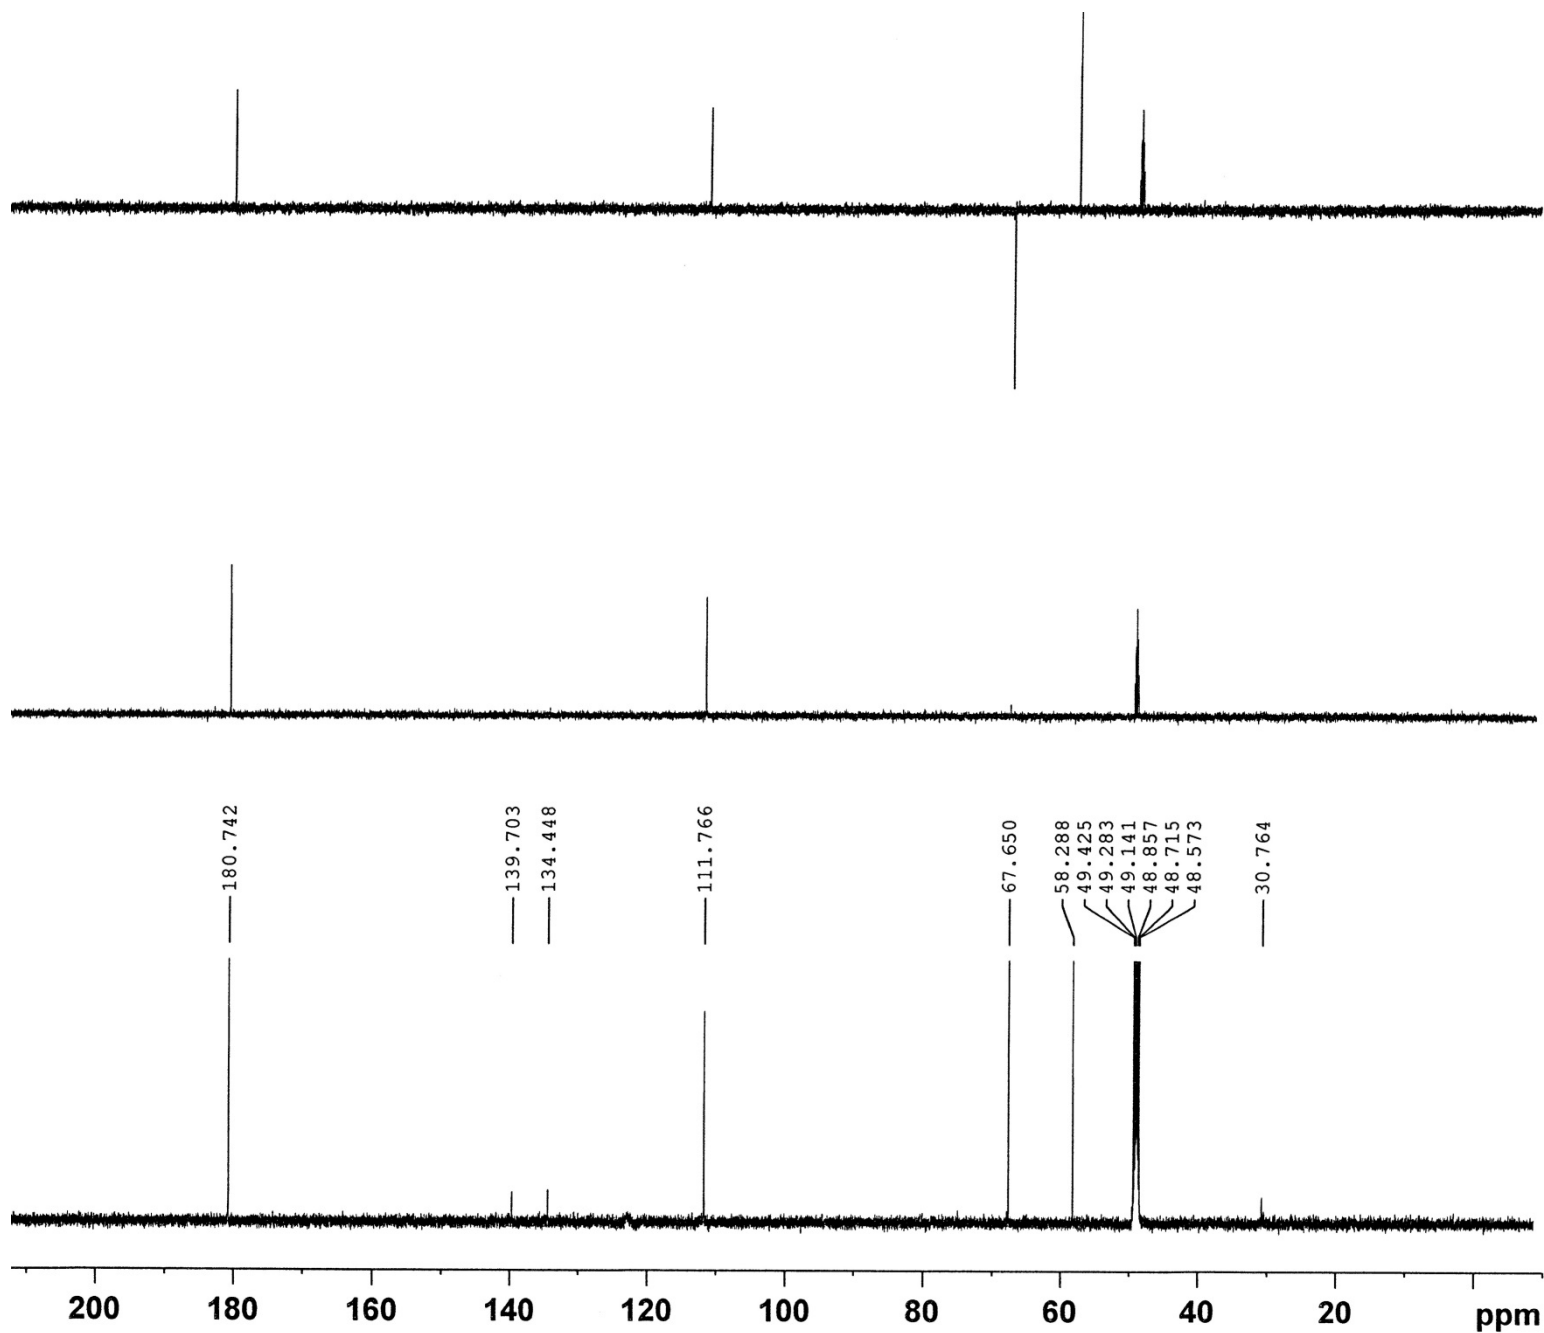

Figure S25.  $^{13}\text{C}$  NMR spectrum of compound 7

T: FTMS + p ESI Full ms [120.0000-1000.0000]

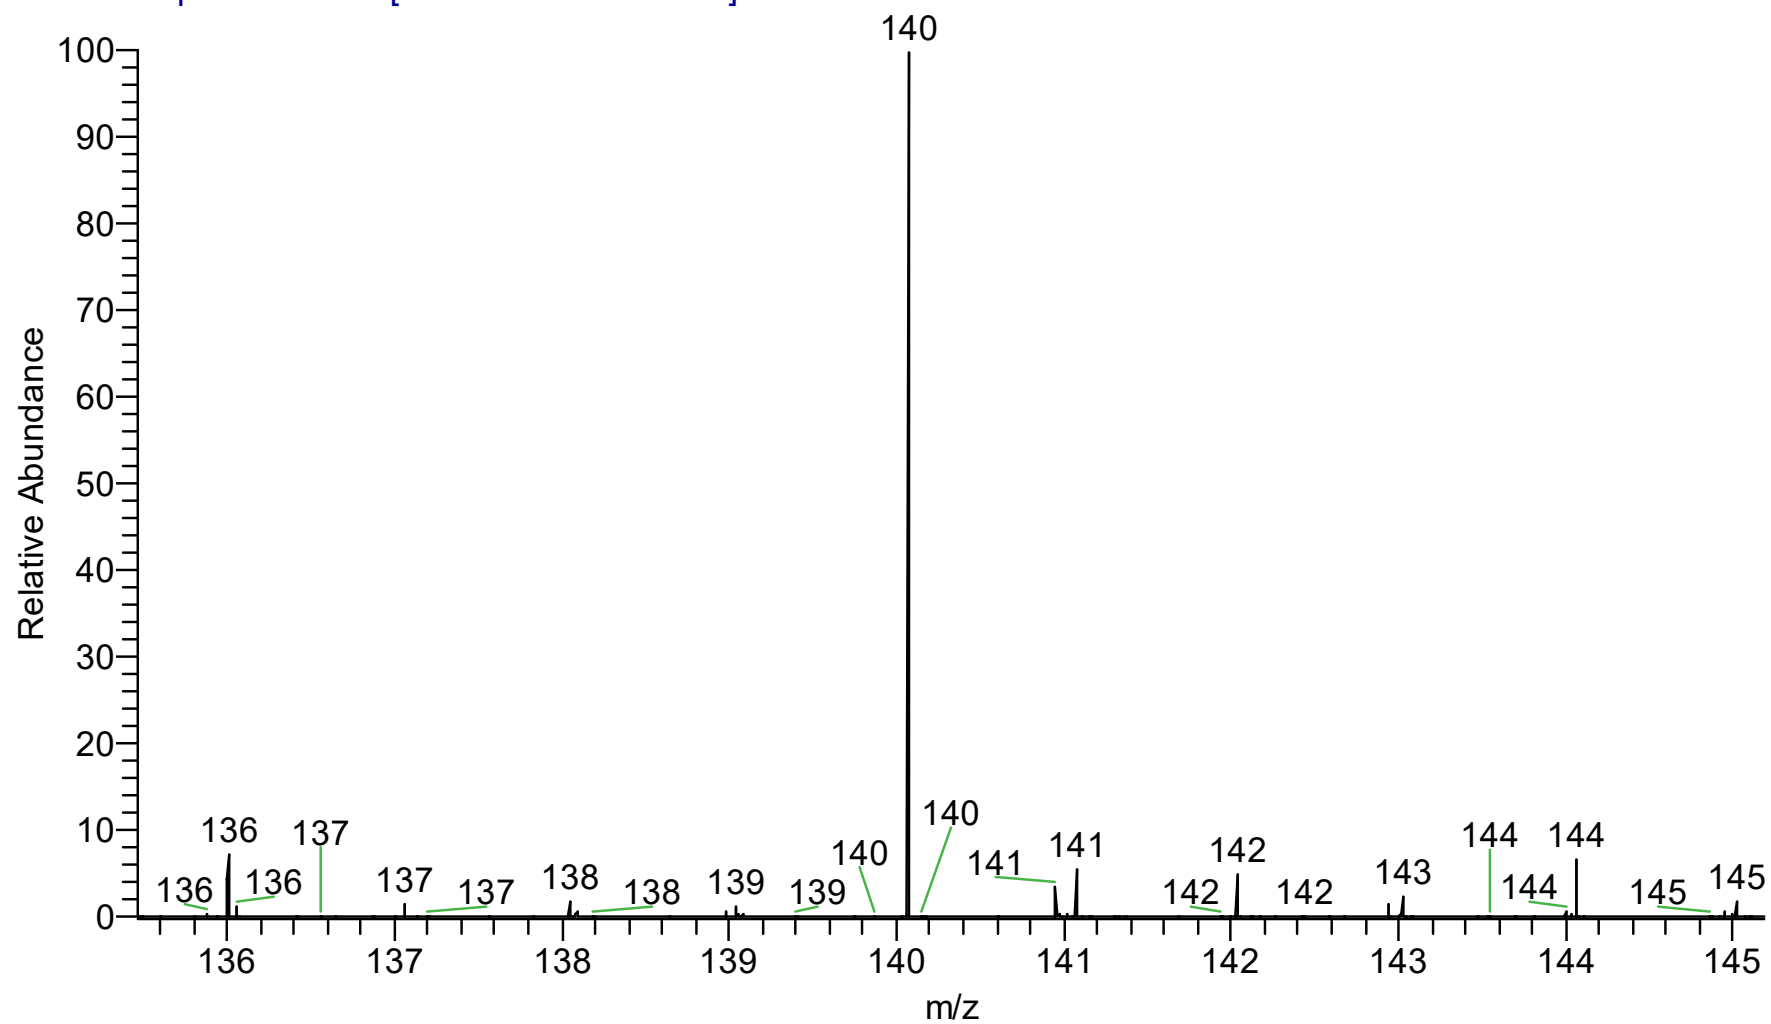

Figure S26. ESI-MS spectrum of compound 7.
